# Supplementary material for: Enantioselective [3 + 2] annulation of 4-isothiocyanato pyrazolones and alkynyl ketones under organocatalysis
Source: Royal Society of Chemistry journal article supplement (doi:10.1039/d0ob02423f), 2021-01-01

## **Enantioselective [3+2] annulation of 4-isothiocyanato pyrazolones and alkynyl ketones under organocatalysis**

Wenyao Wang, Shiqiang Wei, Xiaoze Bao, Shah Nawaz, Jingping Qu and Baomin Wang\*

State Key Laboratory of Fine Chemicals, Department of Pharmaceutical Sciences, School of Chemical Engineering, Dalian University of Technology, Dalian 116024, People's Republic of China.

E-mail: bmwang@dlut.edu.cn

### **Contents**

|                                                                    |    |
|--------------------------------------------------------------------|----|
| 1. General information .....                                       | 1  |
| 2. General procedure of 4-isothiocyanato pyrazolone <b>1</b> ..... | 1  |
| 3. General procedure of ynones <b>2</b> .....                      | 1  |
| 4. General procedure for the synthesis of racemic <b>3</b> .....   | 2  |
| 5. Copies of HPLC chromatographs .....                             | 2  |
| 6. Reference .....                                                 | 20 |
| 7. NMR spectra for compounds .....                                 | 21 |

## 1. General information

Unless otherwise noted, materials were purchased from commercial suppliers and used without further purification. Column chromatography was performed on silica gel (200~300 mesh). Enantiomeric excesses (ee) were determined by HPLC using corresponding commercial chiral columns as stated at 30 °C with UV detector at 254 nm. Optical rotations were reported as follows:  $[\alpha]_D^{25}$  (c g/100 mL, solvent). All  $^1\text{H}$  NMR and  $^{19}\text{F}$  NMR spectra were recorded on a Bruker Avance II 400 MHz and Bruker Avance III 471 MHz respectively,  $^{13}\text{C}$  NMR spectra were recorded on a Bruker Avance II 101 MHz or Bruker Avance III 126 MHz with chemical shifts reported as ppm (in  $\text{CDCl}_3$ , TMS as an internal standard). Data for  $^1\text{H}$  NMR are recorded as follows: chemical shift ( $\delta$ , ppm), multiplicity (s = singlet, d = doublet, t = triplet, m = multiplet, br = broad singlet, dd = double doublet, coupling constants in Hz, integration). HRMS (ESI) was obtained with a HRMS/MS instrument (LTQ Orbitrap XL TM). The absolute configuration of **4** was assigned by the X-ray analysis.

4-Isothiocyanato pyrazolones were prepared according to the literature.<sup>1</sup> Alkynyl ketones were prepared according to the literature.<sup>2</sup> Catalyst **Q5** was synthesized according to the literature procedure.<sup>3</sup> The racemic products were synthesized using quinine/quinidine = 1:1 as the catalyst.

## 2. General procedure of 4-isothiocyanato pyrazolone **1**<sup>1</sup>

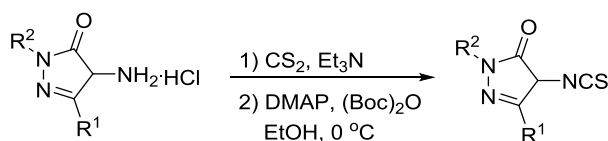

To a suspension of 4-amino pyrazolone hydrochloride (4.0 mmol, 1.0 equiv) in EtOH (10 mL) were added  $\text{CS}_2$  (3.05 g, 40.0 mmol, 10.0 equiv) and  $\text{Et}_3\text{N}$  (1.62 g, 16.0 mmol, 4.0 equiv), under argon. The reaction mixture was stirred for 45 min at room temperature and then cooled on an ice bath. Then a solution of  $\text{Boc}_2\text{O}$  (0.87 g, 4.0 mmol, 1.0 equiv) and DMAP (10 mol %) in 3 mL EtOH was added slowly. The reaction mixture was kept in the ice bath for 5 min, and then stirred for another 15 min at room temperature. Then the reaction mixture was quenched with 10% HCl aqueous (10 mL), and the mixture was extracted with DCM. The combined organic layers were dried over  $\text{Na}_2\text{SO}_4$ , concentrated under vacuum. The residue was purified by flash column chromatography on silica gel (petroleum ether/EtOAc = 6:1) or recrystallization (dichloromethane/hexane) to obtain the 4-isothiocyanato pyrazolone **1a-l** in 40-70% yields.

## 3. General procedure of ynones **2**<sup>2b</sup>

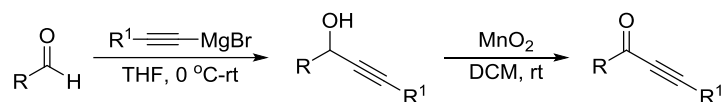

Ethynylmagnesium bromide or 1-propynylmagnesium bromide solution (0.50 M solution in THF 12 mL, 1.2 equiv.) was added dropwise to a stirred solution of aldehyde (5.0 mmol, 1.0 equiv.) in anhydrous THF (10 mL) at 0 °C. The mixture was kept stirring at 0 °C for 20 minutes and warmed to room temperature for additional two hours. Then the reaction mixture was quenched with saturated ammonium chloride (20 mL) and extracted with ethyl acetate for three times. The organic layers was combined and dried with anhydrous  $\text{Na}_2\text{SO}_4$ . It was evaporated

under reduced pressure to give intermediate alcohol, which was used in next step directly. The crude alcohol **6** was dissolved in dichloromethane and treated with activated  $\text{MnO}_2$  (10 equiv.). After completion of the reaction (monitored by TLC), the solid was removed by filtration of the reaction mixture through a pad of celite. Then it was extracted with ethyl acetate and dried with anhydrous  $\text{Na}_2\text{SO}_4$ . Then the reaction mixture was concentrated under reduced pressure and purified by column chromatography to give the desired ynones **2**.

#### 4. General procedure for the synthesis of racemic **3**

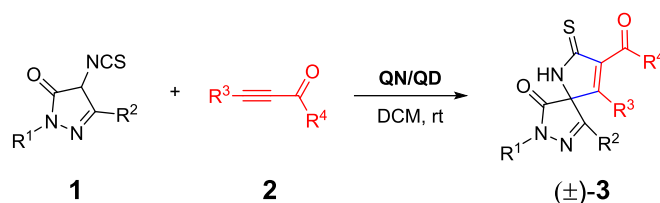

A tube equipped with a magnetic stir bar was charged with 4-isothiocyanato pyrazolone **1** (0.1 mmol), quinine/quinidine = 1:1 (0.01 mmol), and DCM (1 mL). After stirring for 5 min, alkynyl ketone **2** (0.11 mmol) was added in one portion. The reaction was detected by TLC. After 0.5-1 h, the mixture was purified by column chromatography on silica gel (unless otherwise noticed, petroleum ether/EtOAc = 8:1 was used as the eluent) directly to give the product racemic **3**.

#### 5. Copies of HPLC chromatographs

##### Compound **3aa**

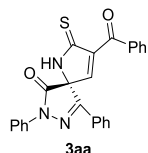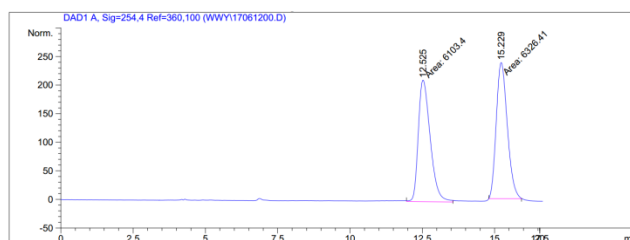

| Peak # | RetTime [min] | Type | Width [min] | Area [mAU*s] | Height [mAU] | Area %  |
|--------|---------------|------|-------------|--------------|--------------|---------|
| 1      | 12.525        | MM   | 0.4783      | 6103.39746   | 212.67453    | 49.1029 |
| 2      | 15.229        | MM   | 0.4428      | 6326.41113   | 238.12169    | 50.8971 |

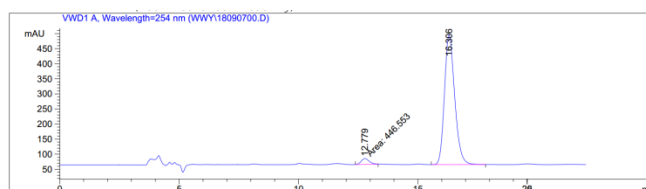

| Peak # | RT [min] | Type | Width [min] | Area      | Area % | Name |
|--------|----------|------|-------------|-----------|--------|------|
| 1      | 12.779   | MM   | 0.382       | 446.553   | 3.369  |      |
| 2      | 16.306   | VB   | 0.457       | 12809.197 | 96.631 |      |

### Compound *ent*-3aa

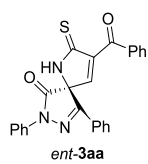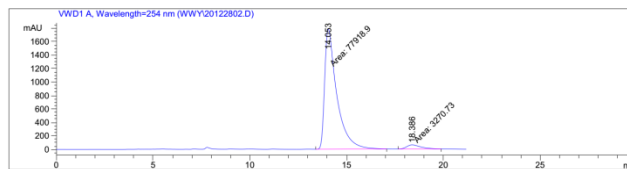

| Peak # | RetTime [min] | Type | Width [min] | Area [mAU*s] | Height [mAU] | Area %  |
|--------|---------------|------|-------------|--------------|--------------|---------|
| 1      | 14.053        | MM   | 0.7281      | 7.79189e4    | 1783.61633   | 95.9715 |
| 2      | 18.386        | MM   | 0.8732      | 3270.72681   | 62.42479     | 4.0285  |

### Gram-Scale Synthesis of 3aa

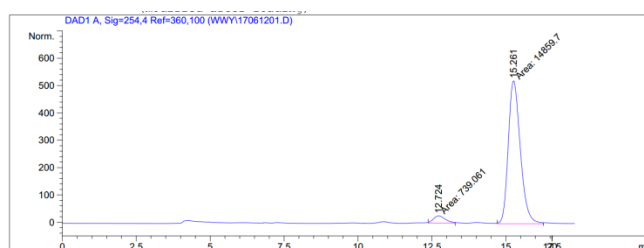

| Peak # | RetTime [min] | Type | Width [min] | Area [mAU*s] | Height [mAU] | Area %  |
|--------|---------------|------|-------------|--------------|--------------|---------|
| 1      | 12.724        | MM   | 0.4651      | 739.06122    | 26.48324     | 4.7380  |
| 2      | 15.261        | MM   | 0.4733      | 1.48597e4    | 523.23450    | 95.2620 |

### Compound 3ba

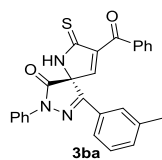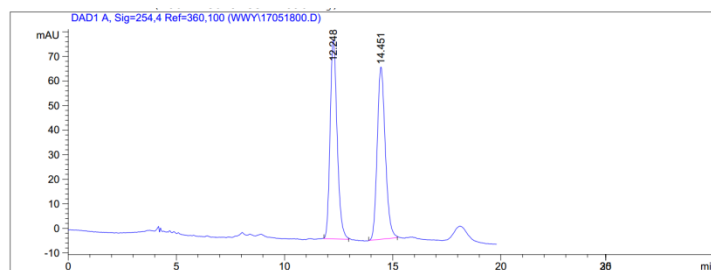

| Peak # | RetTime [min] | Type | Width [min] | Area [mAU*s] | Height [mAU] | Area %  |
|--------|---------------|------|-------------|--------------|--------------|---------|
| 1      | 12.248        | BB   | 0.3466      | 1827.52051   | 81.18167     | 50.0699 |
| 2      | 14.451        | BB   | 0.3951      | 1822.41650   | 70.13963     | 49.9301 |

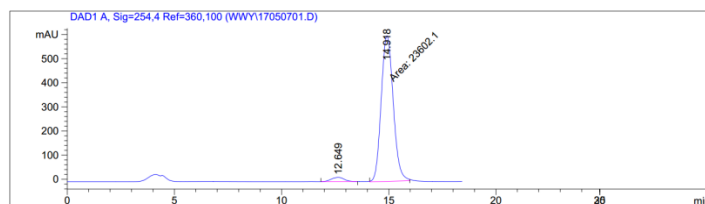

| Peak # | RetTime [min] | Type | Width [min] | Area [mAU*s] | Height [mAU] | Area %  |
|--------|---------------|------|-------------|--------------|--------------|---------|
| 1      | 12.649        | BP   | 0.4957      | 722.19452    | 17.49250     | 2.9690  |
| 2      | 14.918        | MM   | 0.6514      | 2.36021e4    | 603.91205    | 97.0310 |

### Compound 3ca

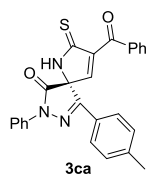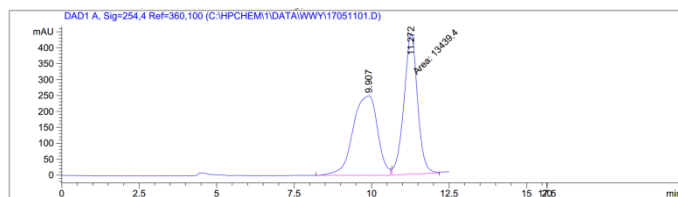

| Peak # | RetTime [min] | Type | Width [min] | Area [mAU*s] | Height [mAU] | Area %  |
|--------|---------------|------|-------------|--------------|--------------|---------|
| 1      | 9.907         | MM   | 0.9061      | 1.33801e4    | 246.11040    | 50.1002 |
| 2      | 11.272        | MM   | 0.5047      | 1.33265e4    | 440.09317    | 49.8998 |

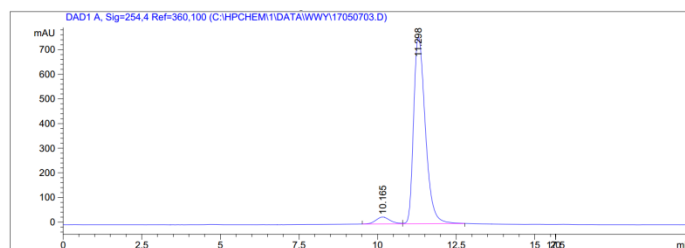

| Peak # | RetTime [min] | Type | Width [min] | Area [mAU*s] | Height [mAU] | Area %  |
|--------|---------------|------|-------------|--------------|--------------|---------|
| 1      | 10.165        | MM   | 0.5020      | 812.64771    | 26.97836     | 3.9958  |
| 2      | 11.298        | MM   | 0.4301      | 1.95249e4    | 756.57880    | 96.0042 |

### Compound 3da

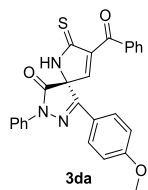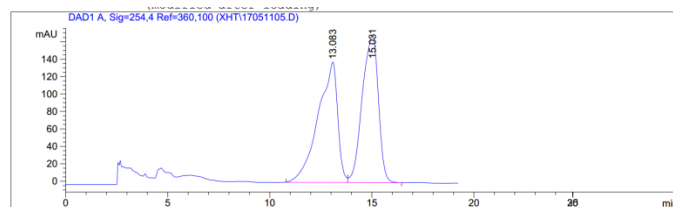

| Peak # | RetTime [min] | Type | Width [min] | Area [mAU*s] | Height [mAU] | Area %  |
|--------|---------------|------|-------------|--------------|--------------|---------|
| 1      | 13.083        | BV   | 0.8801      | 9229.79297   | 138.04152    | 49.9206 |
| 2      | 15.031        | VP   | 0.7597      | 9259.14258   | 168.34567    | 50.0794 |

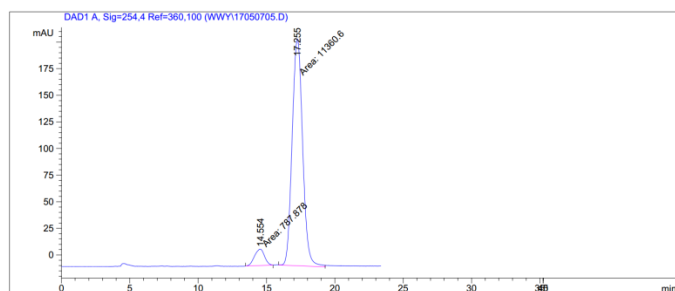

| Peak # | RetTime [min] | Type | Width [min] | Area [mAU*s] | Height [mAU] | Area %  |
|--------|---------------|------|-------------|--------------|--------------|---------|
| 1      | 14.554        | MM   | 0.8506      | 787.87848    | 15.43762     | 6.4854  |
| 2      | 17.255        | MM   | 0.8882      | 1.13606e4    | 213.18442    | 93.5146 |

### Compound 3ea

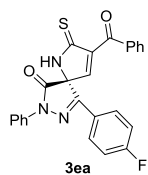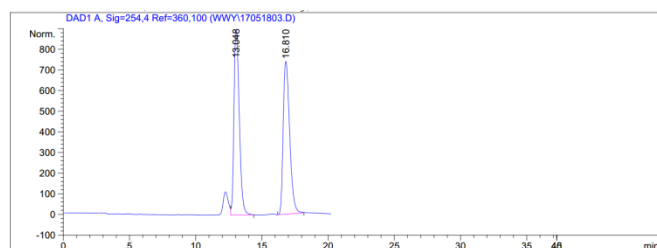

| Peak # | RetTime [min] | Type | Width [min] | Area [mAU*s] | Height [mAU] | Area %  |
|--------|---------------|------|-------------|--------------|--------------|---------|
| 1      | 13.048        | VB   | 0.4315      | 2.49994e4    | 895.93182    | 49.9714 |
| 2      | 16.810        | VB   | 0.5145      | 2.50280e4    | 740.17712    | 50.0286 |

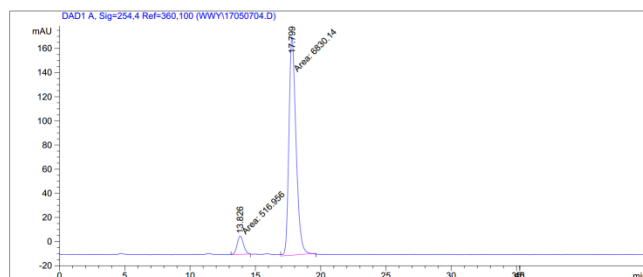

| Peak # | RetTime [min] | Type | Width [min] | Area [mAU*s] | Height [mAU] | Area %  |
|--------|---------------|------|-------------|--------------|--------------|---------|
| 1      | 13.826        | MM   | 0.5676      | 516.95642    | 15.17873     | 7.0362  |
| 2      | 17.799        | MM   | 0.6294      | 6830.13770   | 180.87192    | 92.9638 |

### Compound 3fa

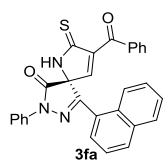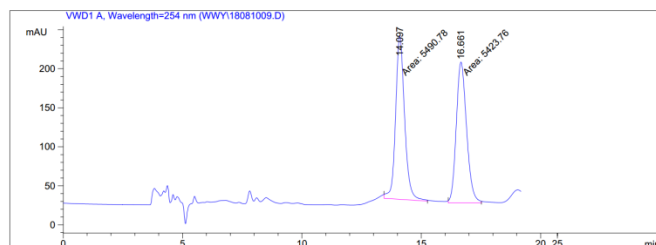

| Peak # | RT [min] | Type | Width [min] | Area     | Area % | Name |
|--------|----------|------|-------------|----------|--------|------|
| 1      | 14.097   | MM   | 0.437       | 5490.781 | 50.307 |      |
| 2      | 16.661   | MM   | 0.501       | 5423.756 | 49.693 |      |

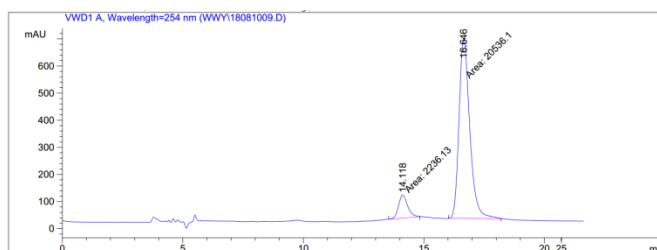

| Peak # | RT [min] | Type | Width [min] | Area      | Area % | Name |
|--------|----------|------|-------------|-----------|--------|------|
| 1      | 14.118   | MM   | 0.436       | 2236.127  | 9.820  |      |
| 2      | 16.646   | MM   | 0.515       | 20536.100 | 90.180 |      |

### Compound 3ga

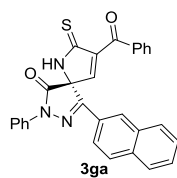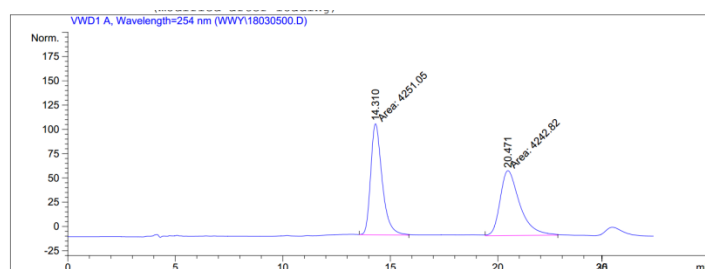

| Peak # | RT [min] | Type | Width [min] | Area     | Area % | Name |
|--------|----------|------|-------------|----------|--------|------|
| 1      | 14.310   | MM   | 0.618       | 4237.101 | 50.334 |      |
| 2      | 20.471   | BB   | 0.948       | 4180.924 | 49.666 |      |

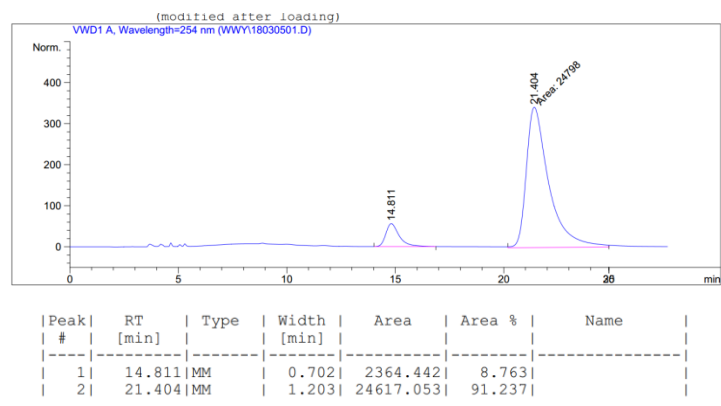

### Compound 3ha

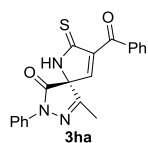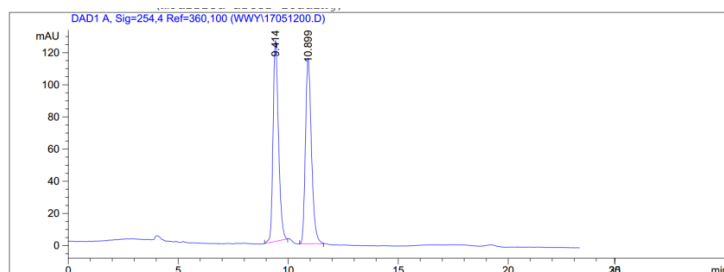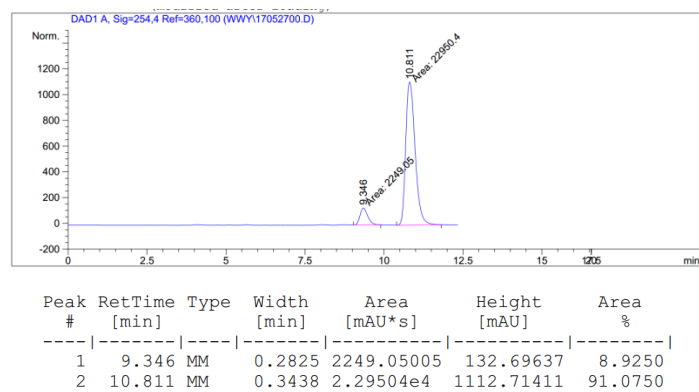



## Compound 3ia

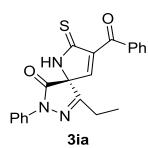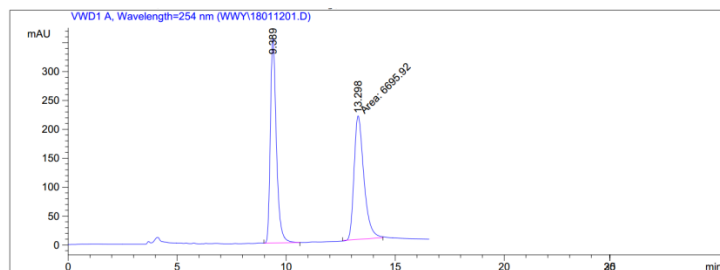

| Peak # | RT [min] | Type | Width [min] | Area     | Area % | Name |
|--------|----------|------|-------------|----------|--------|------|
| 1      | 9.389    | VB   | 0.291       | 6792.231 | 49.844 |      |
| 2      | 13.298   | MM   | 0.529       | 6834.824 | 50.156 |      |

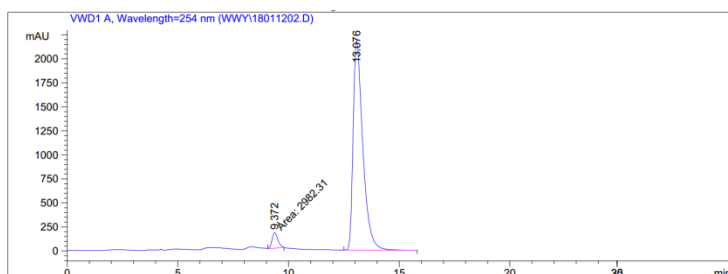

| Peak # | RT [min] | Type | Width [min] | Area      | Area % | Name |
|--------|----------|------|-------------|-----------|--------|------|
| 1      | 9.372    | MM   | 0.313       | 3065.075  | 4.428  |      |
| 2      | 13.076   | BBA  | 0.456       | 66148.148 | 95.572 |      |

## Compound 3ja

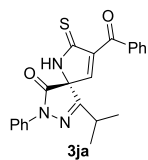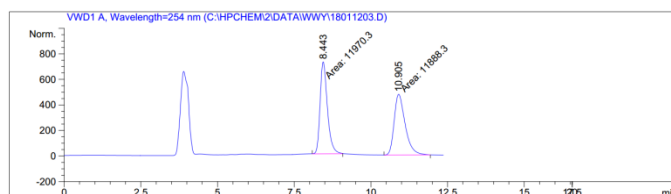

| Peak # | RetTime [min] | Type | Width [min] | Area mAU  | Height *s [mAU] | Area %  |
|--------|---------------|------|-------------|-----------|-----------------|---------|
| 1      | 8.443         | MM   | 0.2770      | 1.19703e4 | 720.28613       | 1.204e3 |
| 2      | 10.905        | MM   | 0.4165      | 1.18883e4 | 475.75409       | 1.196e3 |

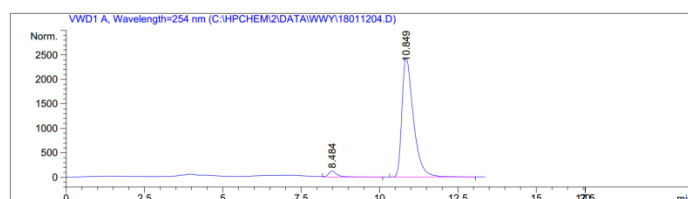

| Peak # | RT [min] | Type | Width [min] | Area      | Area % | Name |
|--------|----------|------|-------------|-----------|--------|------|
| 1      | 8.484    | MM   | 0.288       | 2014.212  | 3.147  |      |
| 2      | 10.849   | PB   | 0.384       | 61997.816 | 96.853 |      |

### Compound 3ka

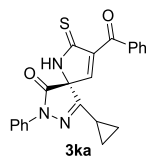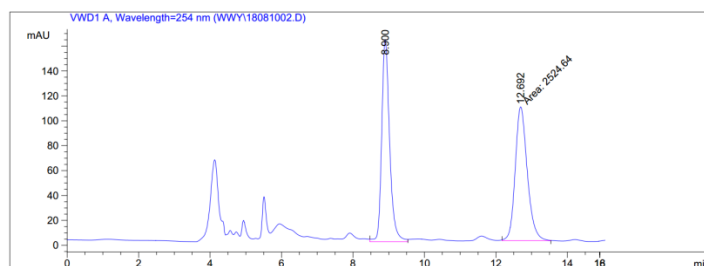

| Peak # | RT [min] | Type | Width [min] | Area     | Area % | Name |
|--------|----------|------|-------------|----------|--------|------|
| 1      | 8.900    | VV   | 0.235       | 2500.868 | 49.401 |      |
| 2      | 12.692   | MM   | 0.395       | 2561.491 | 50.599 |      |

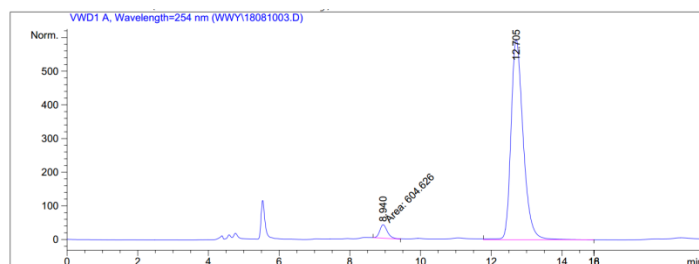

| Peak # | RT [min] | Type | Width [min] | Area      | Area % | Name |
|--------|----------|------|-------------|-----------|--------|------|
| 1      | 8.940    | MM   | 0.252       | 604.626   | 4.075  |      |
| 2      | 12.705   | VB   | 0.366       | 14231.077 | 95.925 |      |

### Compound 3la

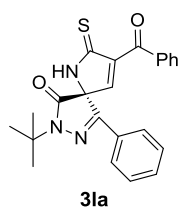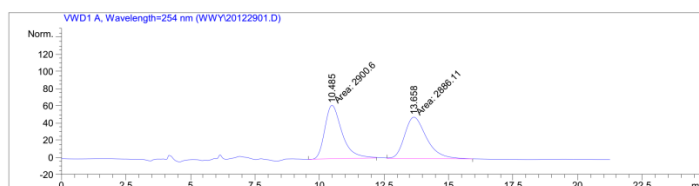

| Peak # | RetTime [min] | Type | Width [min] | Area mAU *s | Height [mAU] | Area %  |
|--------|---------------|------|-------------|-------------|--------------|---------|
| 1      | 10.485        | MM   | 0.7765      | 2900.60352  | 62.25584     | 50.1252 |
| 2      | 13.658        | MM   | 0.9950      | 2886.11426  | 48.34197     | 49.8748 |

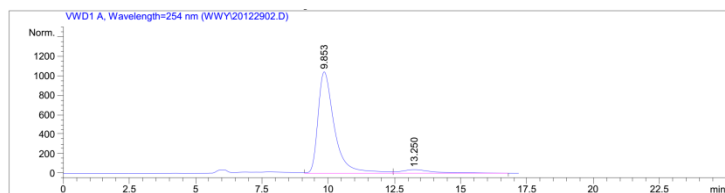

| Peak # | RetTime [min] | Type | Width [min] | Area mAU*s | Height [mAU] | Area %  |
|--------|---------------|------|-------------|------------|--------------|---------|
| 1      | 9.853         | VB   | 0.6462      | 4.49185e4  | 1040.88782   | 93.4091 |
| 2      | 13.250        | BB   | 1.2042      | 3169.45190 | 36.96356     | 6.5909  |

### Compound 3ab

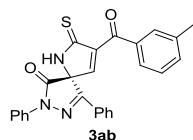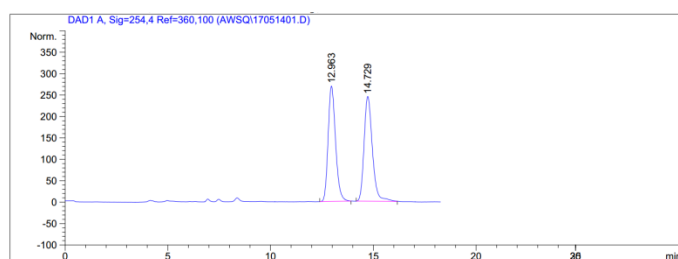

| Peak # | RetTime [min] | Type | Width [min] | Area [mAU*s] | Height [mAU] | Area %  |
|--------|---------------|------|-------------|--------------|--------------|---------|
| 1      | 12.963        | BB   | 0.3891      | 6770.12256   | 269.46396    | 49.5519 |
| 2      | 14.729        | BB   | 0.4325      | 6892.57422   | 244.77995    | 50.4481 |

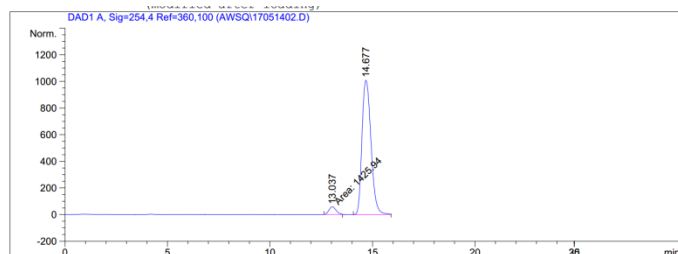

| Peak # | RetTime [min] | Type | Width [min] | Area [mAU*s] | Height [mAU] | Area %  |
|--------|---------------|------|-------------|--------------|--------------|---------|
| 1      | 13.037        | MM   | 0.4091      | 1425.94238   | 58.08615     | 4.4106  |
| 2      | 14.677        | BBA  | 0.4851      | 3.09042e4    | 1009.77924   | 95.5894 |

### Compound 3ac

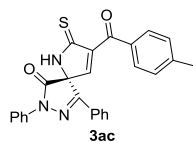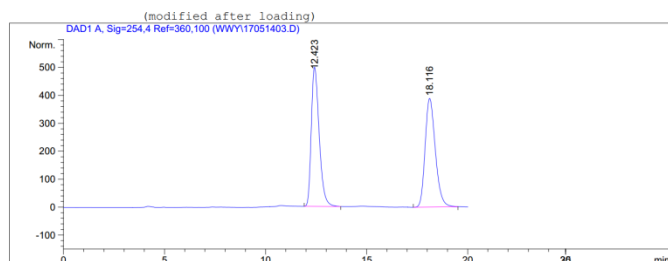

| Peak # | RetTime [min] | Type | Width [min] | Area [mAU*s] | Height [mAU] | Area %  |
|--------|---------------|------|-------------|--------------|--------------|---------|
| 1      | 12.423        | BB   | 0.4204      | 1.35146e4    | 498.32605    | 49.7093 |
| 2      | 18.116        | PB   | 0.5378      | 1.36727e4    | 389.20551    | 50.2907 |

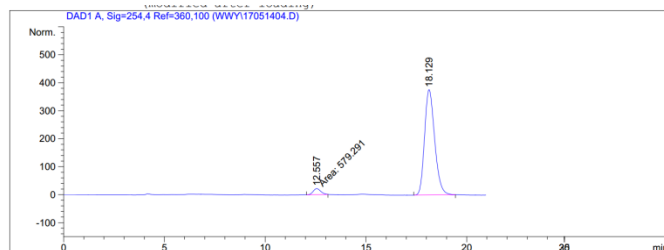

| Peak # | RetTime [min] | Type | Width [min] | Area [mAU*s] | Height [mAU] | Area %  |
|--------|---------------|------|-------------|--------------|--------------|---------|
| 1      | 12.557        | MM   | 0.4442      | 579.29053    | 21.73561     | 4.2174  |
| 2      | 18.129        | BB   | 0.5414      | 1.31565e4    | 376.73715    | 95.7826 |

### Compound 3ad

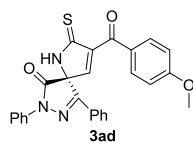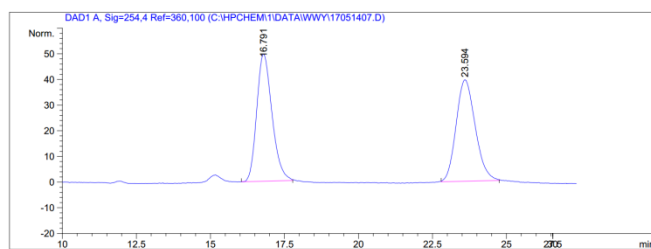

| Peak # | RetTime [min] | Type | Width [min] | Area [mAU*s] | Height [mAU] | Area %  |
|--------|---------------|------|-------------|--------------|--------------|---------|
| 1      | 16.791        | BB   | 0.5449      | 1777.95374   | 49.51872     | 50.0369 |
| 2      | 23.594        | BB   | 0.5902      | 1775.33350   | 39.51564     | 49.9631 |

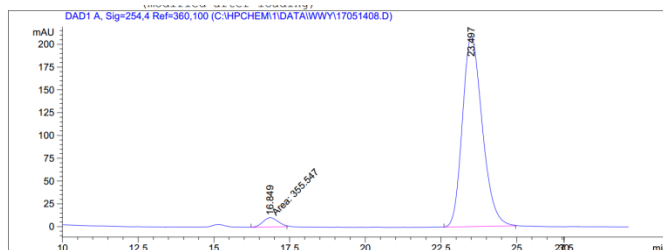

| Peak # | RetTime [min] | Type | Width [min] | Area [mAU*s] | Height [mAU] | Area %  |
|--------|---------------|------|-------------|--------------|--------------|---------|
| 1      | 16.849        | MM   | 0.5777      | 355.54651    | 10.25815     | 3.5922  |
| 2      | 23.497        | BB   | 0.6894      | 9542.18555   | 208.69055    | 96.4078 |

## Compound 3ae

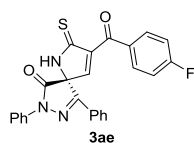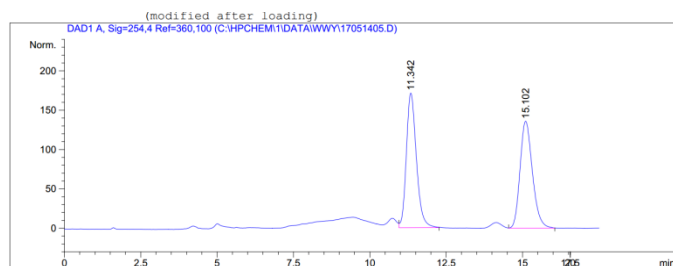

| Peak # | RetTime [min] | Type | Width [min] | Area [mAU*s] | Height [mAU] | Area %  |
|--------|---------------|------|-------------|--------------|--------------|---------|
| 1      | 11.342        | VB   | 0.3525      | 3909.26514   | 171.15196    | 50.5170 |
| 2      | 15.102        | VB   | 0.4345      | 3829.25439   | 136.00378    | 49.4830 |

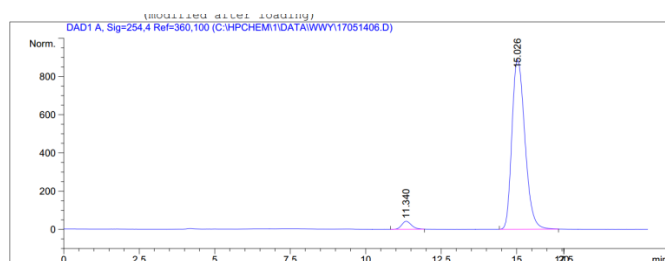

| Peak # | RetTime [min] | Type | Width [min] | Area [mAU*s] | Height [mAU] | Area %  |
|--------|---------------|------|-------------|--------------|--------------|---------|
| 1      | 11.340        | BB   | 0.3429      | 940.30994    | 42.04588     | 3.4184  |
| 2      | 15.026        | BB   | 0.4701      | 2.65672e4    | 885.37549    | 96.5816 |

## Compound 3af

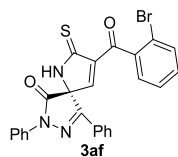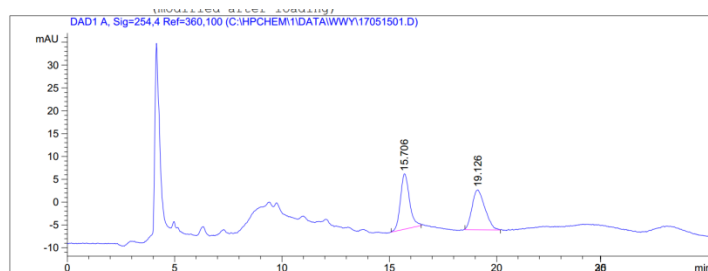

| Peak # | RetTime [min] | Type | Width [min] | Area [mAU*s] | Height [mAU] | Area %  |
|--------|---------------|------|-------------|--------------|--------------|---------|
| 1      | 15.706        | BB   | 0.4322      | 357.93979    | 12.13084     | 49.5879 |
| 2      | 19.126        | BB   | 0.4922      | 363.88959    | 8.76781      | 50.4121 |

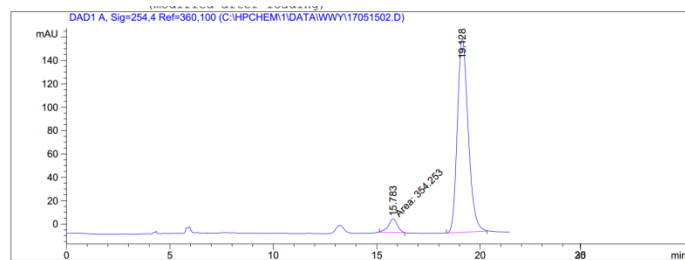

| Peak # | RetTime [min] | Type | Width [min] | Area [mAU*s] | Height [mAU] | Area %  |
|--------|---------------|------|-------------|--------------|--------------|---------|
| 1      | 15.783        | MM   | 0.5074      | 354.25250    | 11.63511     | 5.5343  |
| 2      | 19.128        | BB   | 0.5486      | 6046.73193   | 166.13460    | 94.4657 |

### Compound 3ag

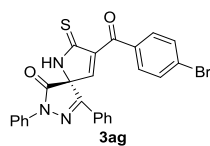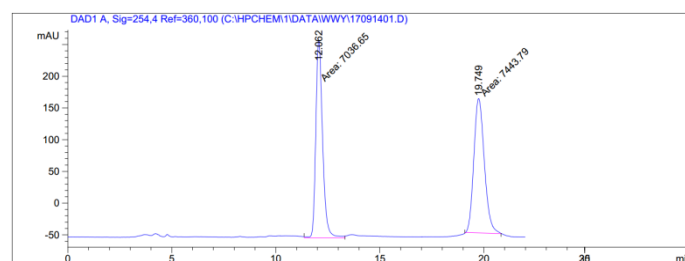

| Peak # | RetTime [min] | Type | Width [min] | Area [mAU*s] | Height [mAU] | Area %  |
|--------|---------------|------|-------------|--------------|--------------|---------|
| 1      | 12.062        | MM   | 0.3760      | 7036.64600   | 311.89212    | 48.5942 |
| 2      | 19.749        | MM   | 0.5855      | 7443.79102   | 211.90860    | 51.4058 |

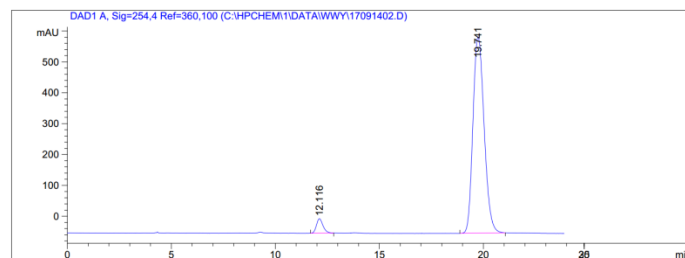

| Peak # | RetTime [min] | Type | Width [min] | Area [mAU*s] | Height [mAU] | Area %  |
|--------|---------------|------|-------------|--------------|--------------|---------|
| 1      | 12.116        | BB   | 0.3375      | 1041.18372   | 47.16986     | 4.1956  |
| 2      | 19.741        | PB   | 0.5803      | 2.37749e4    | 635.74103    | 95.8044 |

### Compound 3ah

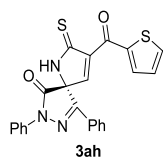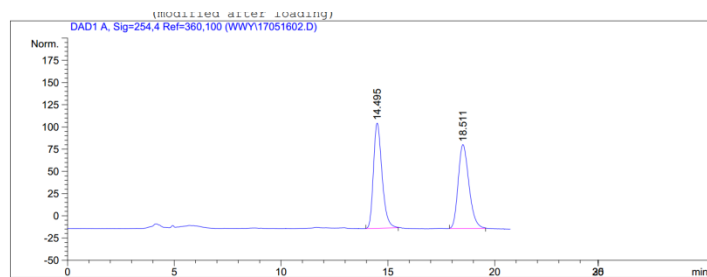

| Peak # | RetTime [min] | Type | Width [min] | Area [mAU*s] | Height [mAU] | Area %  |
|--------|---------------|------|-------------|--------------|--------------|---------|
| 1      | 14.495        | BB   | 0.4235      | 3303.89038   | 118.41063    | 49.9624 |
| 2      | 18.511        | BB   | 0.5348      | 3308.86792   | 94.43951     | 50.0376 |

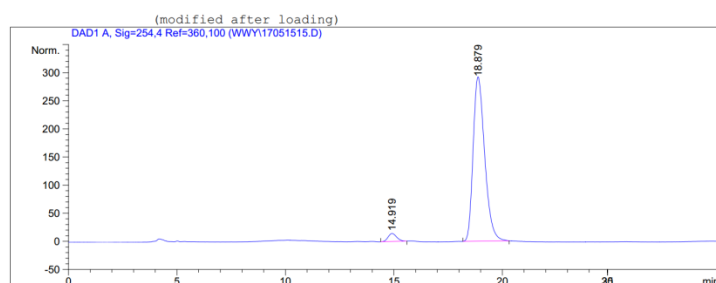

| Peak # | RetTime [min] | Type | Width [min] | Area [mAU*s] | Height [mAU] | Area %  |
|--------|---------------|------|-------------|--------------|--------------|---------|
| 1      | 14.919        | PV   | 0.3977      | 393.07764    | 14.34318     | 3.5016  |
| 2      | 18.879        | BB   | 0.5662      | 1.08326e4    | 292.39658    | 96.4984 |

### Compound 3ai

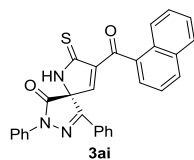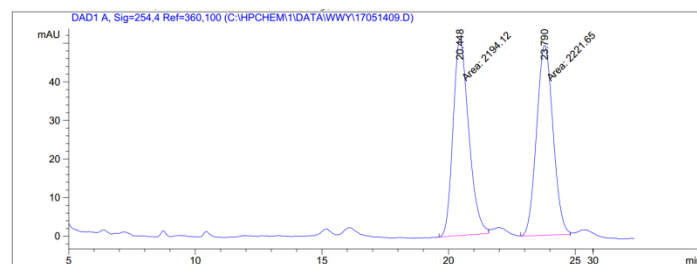

| Peak # | RetTime [min] | Type | Width [min] | Area [mAU*s] | Height [mAU] | Area %  |
|--------|---------------|------|-------------|--------------|--------------|---------|
| 1      | 20.448        | MM   | 0.7181      | 2194.11548   | 50.92534     | 49.6882 |
| 2      | 23.790        | MM   | 0.7530      | 2221.65454   | 49.17273     | 50.3118 |

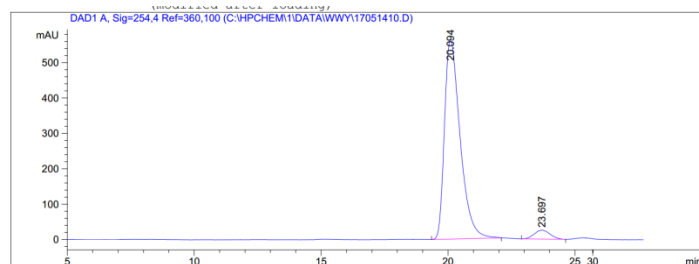

| Peak # | RetTime [min] | Type | Width [min] | Area [mAU*s] | Height [mAU] | Area %  |
|--------|---------------|------|-------------|--------------|--------------|---------|
| 1      | 20.094        | PB   | 0.6444      | 2.40948e4    | 564.01581    | 95.7046 |
| 2      | 23.697        | PP   | 0.5272      | 1081.42822   | 24.97316     | 4.2954  |

### Compound 3aj

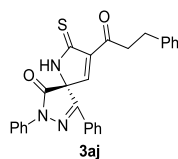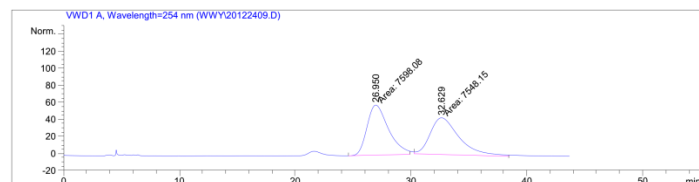

| Peak # | RetTime [min] | Type | Width [min] | Area mAU *s | Height [mAU] | Area %  |
|--------|---------------|------|-------------|-------------|--------------|---------|
| 1      | 26.950        | MM   | 2.1520      | 7598.07520  | 58.84440     | 50.1648 |
| 2      | 32.629        | MM   | 2.9157      | 7548.15283  | 43.14595     | 49.8352 |

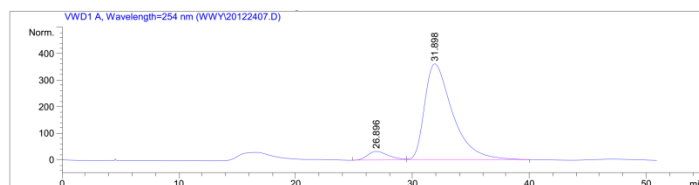

| Peak # | RetTime [min] | Type | Width [min] | Area mAU *s | Height [mAU] | Area %  |
|--------|---------------|------|-------------|-------------|--------------|---------|
| 1      | 26.896        | BV   | 1.6552      | 4137.22998  | 33.05692     | 6.4050  |
| 2      | 31.898        | VB   | 2.4809      | 6.04565e4   | 362.06848    | 93.5950 |

### Compound 3ak

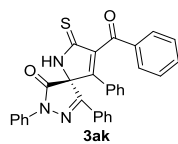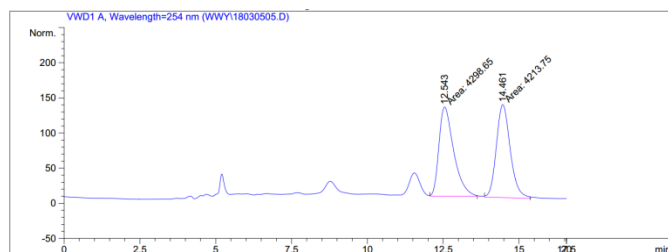



| Peak # | RetTime [min] | Type | Width [min] | Area [mAU*s] | Height [mAU] | Area %  |
|--------|---------------|------|-------------|--------------|--------------|---------|
| 1      | 12.543        | MM   | 0.5643      | 4298.64795   | 126.95582    | 1.212e3 |
| 2      | 14.461        | MM   | 0.5304      | 4213.74902   | 132.39784    | 1.188e3 |

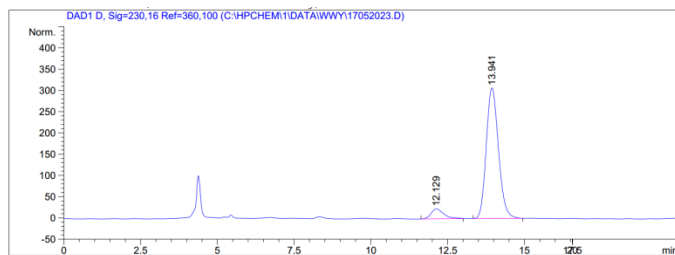

| Peak # | RetTime [min] | Type | Width [min] | Area [mAU*s] | Height [mAU] | Area %  |
|--------|---------------|------|-------------|--------------|--------------|---------|
| 1      | 12.129        | BB   | 0.4155      | 677.68359    | 23.42543     | 7.3944  |
| 2      | 13.941        | BB   | 0.4302      | 8487.19434   | 307.27859    | 92.6056 |

### Compound 3al

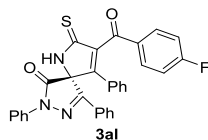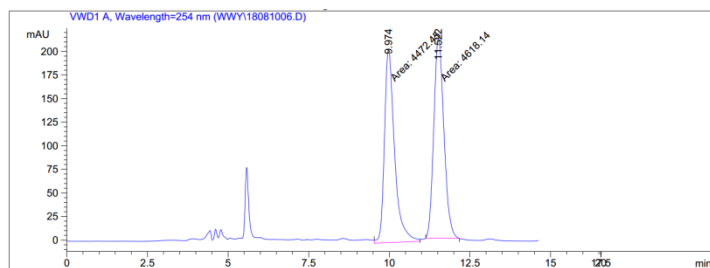

| Peak # | RT [min] | Type | Width [min] | Area     | Area % | Name |
|--------|----------|------|-------------|----------|--------|------|
| 1      | 9.974    | MM   | 0.363       | 4472.455 | 49.199 |      |
| 2      | 11.522   | MM   | 0.364       | 4618.135 | 50.801 |      |

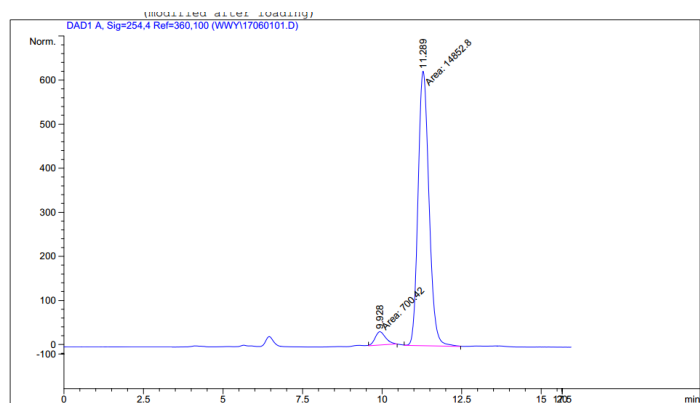

| Peak # | RetTime [min] | Type | Width [min] | Area [mAU*s] | Height [mAU] | Area %  |
|--------|---------------|------|-------------|--------------|--------------|---------|
| 1      | 9.928         | MM   | 0.3839      | 700.41986    | 30.40674     | 4.5034  |
| 2      | 11.289        | MM   | 0.3973      | 1.48528e4    | 623.10040    | 95.4966 |

### Compound 3am

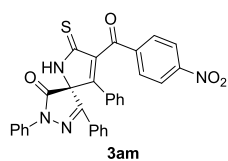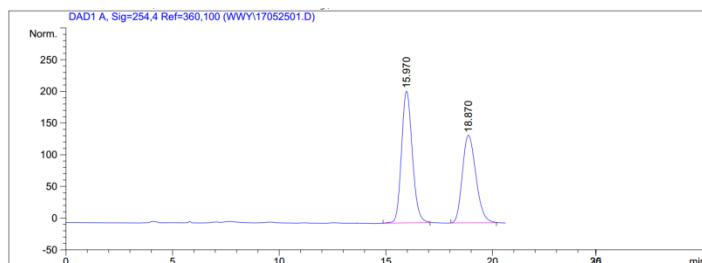

| Peak # | RetTime [min] | Type | Width [min] | Area [mAU*s] | Height [mAU] | Area %  |
|--------|---------------|------|-------------|--------------|--------------|---------|
| 1      | 15.970        | BB   | 0.5402      | 7309.07520   | 207.86688    | 54.4411 |
| 2      | 18.870        | BB   | 0.6730      | 6116.58301   | 138.56688    | 45.5589 |

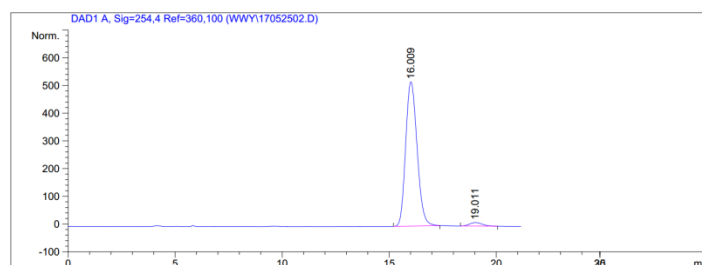

| Peak # | RetTime [min] | Type | Width [min] | Area [mAU*s] | Height [mAU] | Area %  |
|--------|---------------|------|-------------|--------------|--------------|---------|
| 1      | 16.009        | BB   | 0.5862      | 1.92937e4    | 520.83484    | 97.2973 |
| 2      | 19.011        | BB   | 0.4943      | 535.94293    | 13.01842     | 2.7027  |

### Compound 3an

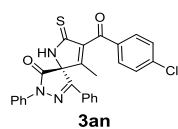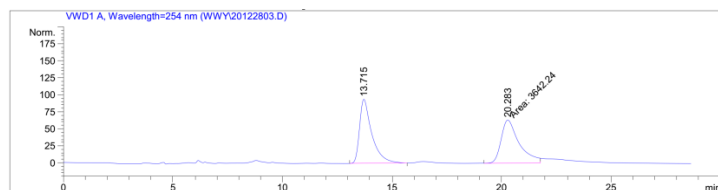

| Peak # | RetTime [min] | Type | Width [min] | Area [mAU*s] | Height [mAU] | Area %  |
|--------|---------------|------|-------------|--------------|--------------|---------|
| 1      | 13.715        | BB   | 0.5635      | 3664.30664   | 94.09260     | 50.1510 |
| 2      | 20.283        | MM   | 0.9561      | 3642.24146   | 63.48817     | 49.8490 |

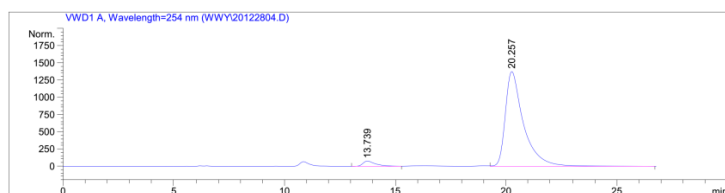

| Peak # | RetTime [min] | Type | Width [min] | Area mAU *s | Height [mAU] | Area %  |
|--------|---------------|------|-------------|-------------|--------------|---------|
| 1      | 13.739        | BB   | 0.5773      | 3092.67090  | 77.08334     | 3.7910  |
| 2      | 20.257        | VB   | 0.8322      | 7.84857e4   | 1374.47986   | 96.2090 |

### Compound 3ao

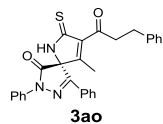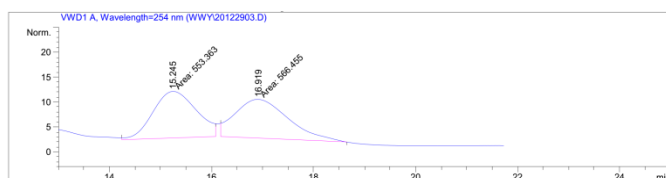

| Peak # | RetTime [min] | Type | Width [min] | Area mAU *s | Height [mAU] | Area %  |
|--------|---------------|------|-------------|-------------|--------------|---------|
| 1      | 15.245        | MM   | 0.9853      | 553.36255   | 9.36015      | 49.4154 |
| 2      | 16.919        | MM   | 1.2132      | 566.45514   | 7.78208      | 50.5846 |

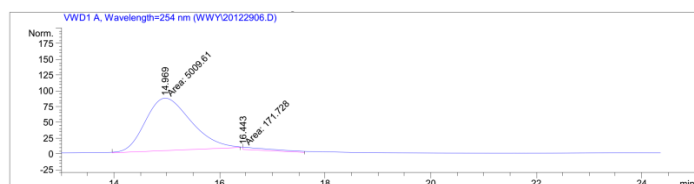

| Peak # | RetTime [min] | Type | Width [min] | Area mAU *s | Height [mAU] | Area %  |
|--------|---------------|------|-------------|-------------|--------------|---------|
| 1      | 14.969        | MM   | 1.0021      | 5009.60840  | 83.31757     | 96.6856 |
| 2      | 16.443        | MM   | 0.7780      | 171.72791   | 3.67887      | 3.3144  |

### Compound 4

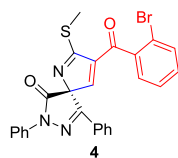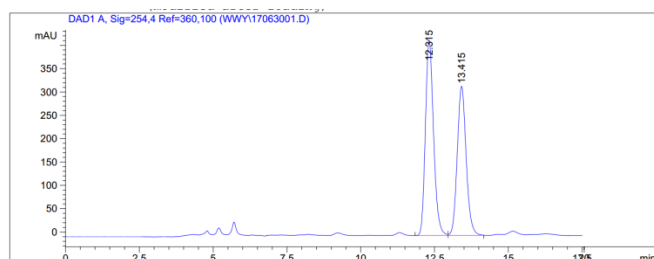

| Peak # | RetTime [min] | Type | Width [min] | Area [mAU*s] | Height [mAU] | Area %  |
|--------|---------------|------|-------------|--------------|--------------|---------|
| 1      | 12.315        | PV   | 0.2950      | 8009.60303   | 419.11423    | 54.5035 |
| 2      | 13.415        | VB   | 0.3219      | 6685.96875   | 319.76541    | 45.4965 |

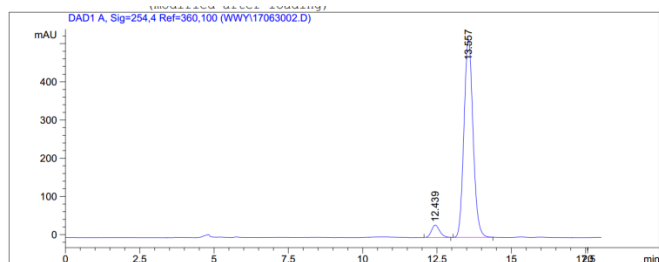

| Peak # | RetTime [min] | Type | Width [min] | Area [mAU*s] | Height [mAU] | Area %  |
|--------|---------------|------|-------------|--------------|--------------|---------|
| 1      | 12.439        | BB   | 0.2872      | 633.90479    | 32.83389     | 5.4319  |
| 2      | 13.557        | BB   | 0.3300      | 1.10361e4    | 519.21307    | 94.5681 |

## Compound 5

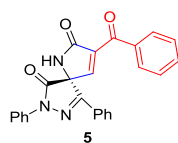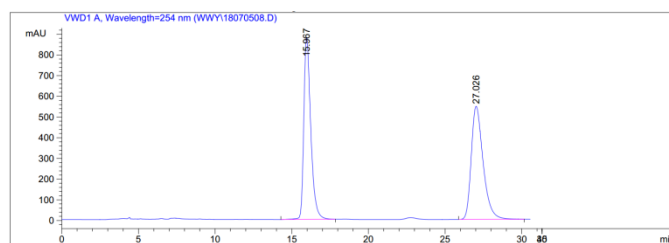

| Peak # | RT [min] | Type | Width [min] | Area      | Area % | Name |
|--------|----------|------|-------------|-----------|--------|------|
| 1      | 15.967   | BB   | 0.475       | 27656.131 | 48.568 |      |
| 2      | 27.026   | BB   | 0.809       | 29286.412 | 51.432 |      |

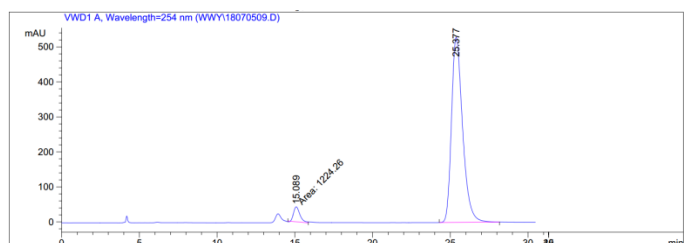

| Peak # | RT [min] | Type | Width [min] | Area      | Area % | Name |
|--------|----------|------|-------------|-----------|--------|------|
| 1      | 15.088   | MM   | 0.451       | 1155.021  | 4.217  |      |
| 2      | 25.377   | BB   | 0.756       | 26232.715 | 95.783 |      |

## 6. Reference

1. X. Bao, S. Wei, X. Qian, J. Qu, B. Wang, L. Zou and G. Ge, *Org. Lett.*, 2018, **20**, 3394-3398.
2. (a) F. Shi, S.-W. Luo, Z.-L. Tao, L. He, J. Yu, S.-J. Tu and L.-Z. Gong, *Org. Lett.*, 2011, **13**, 4680-4683; (b) J. Rong, H. Li, R. Fu, W. Sun, T.-P. Loh and Y. Jiang, *ACS Catal.*, 2020, **10**, 3664-3669.
3. W. Yang and D.-M. Du, *Org. Lett.* , 2010, **12**, 5450-5453.

## 7. NMR spectra for compounds

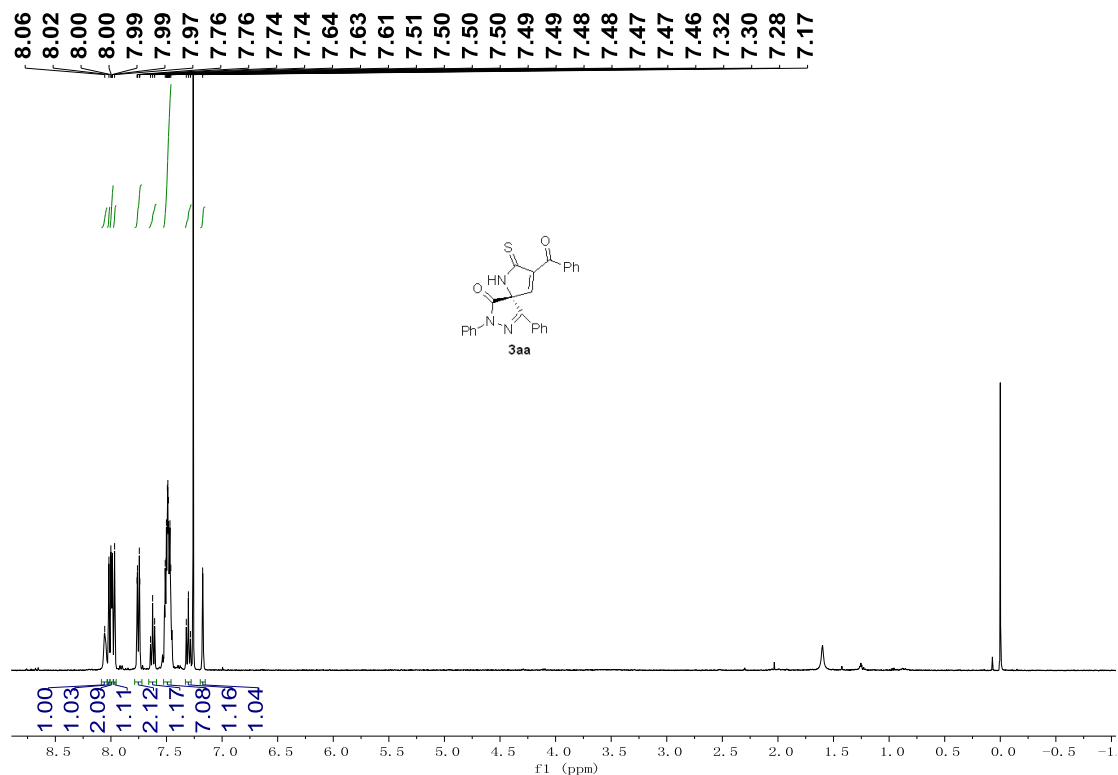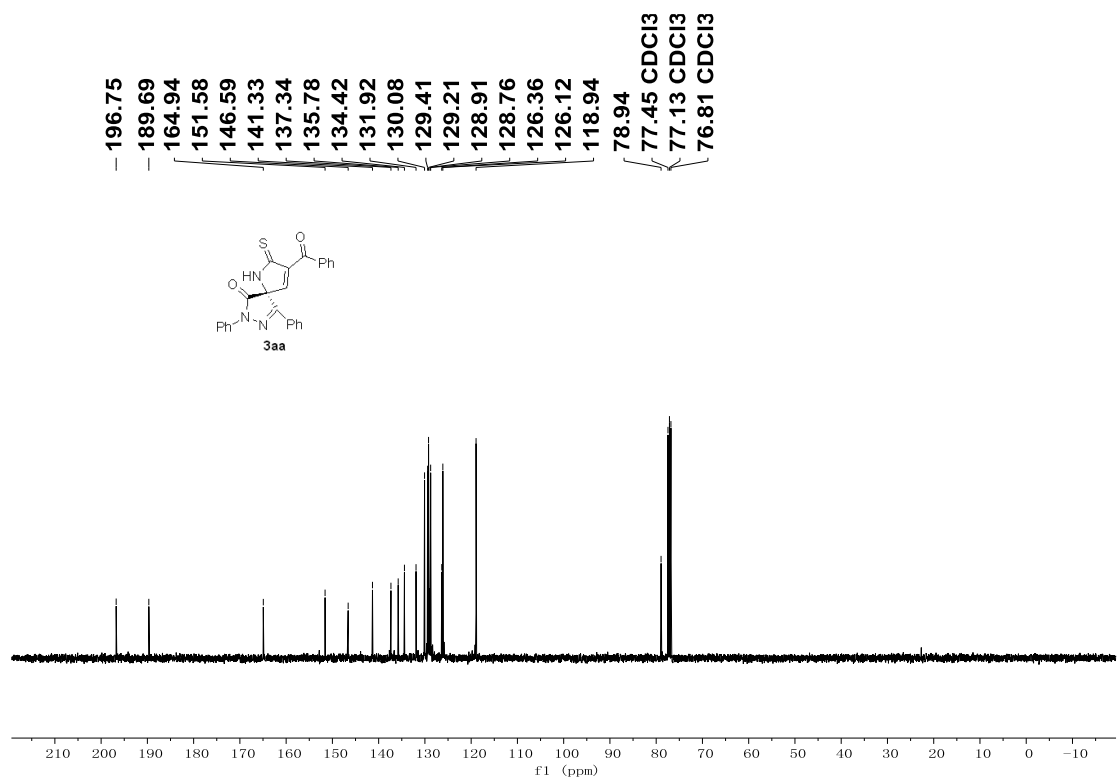

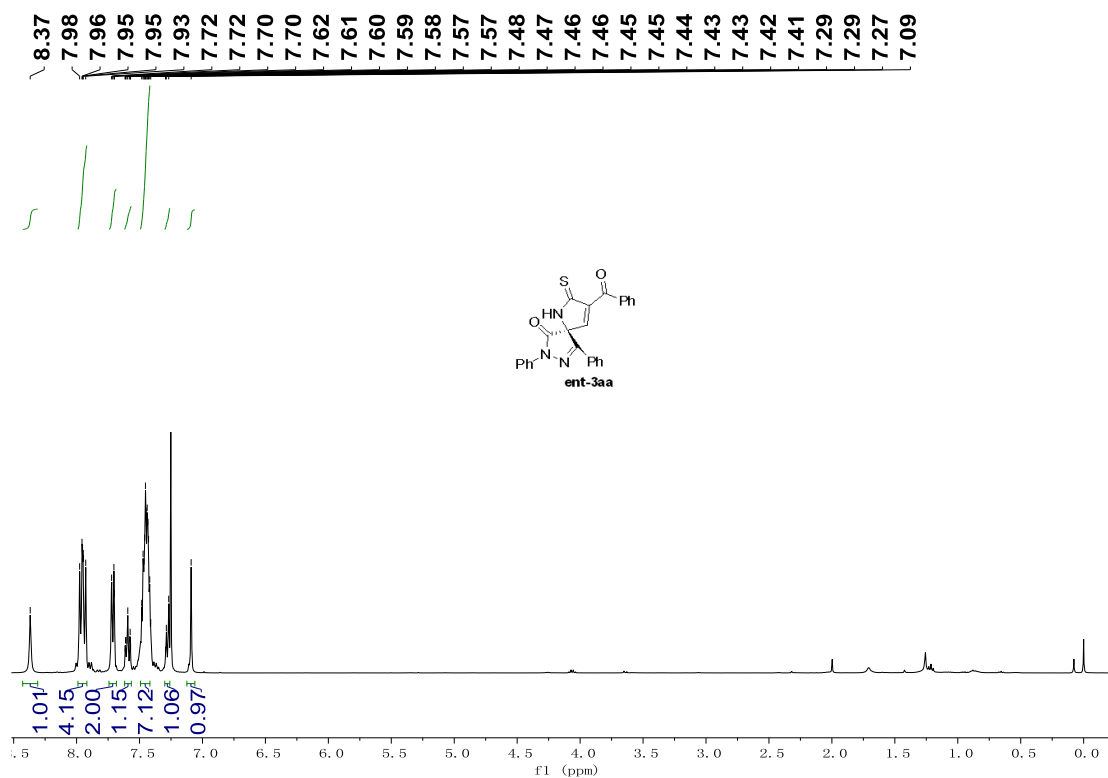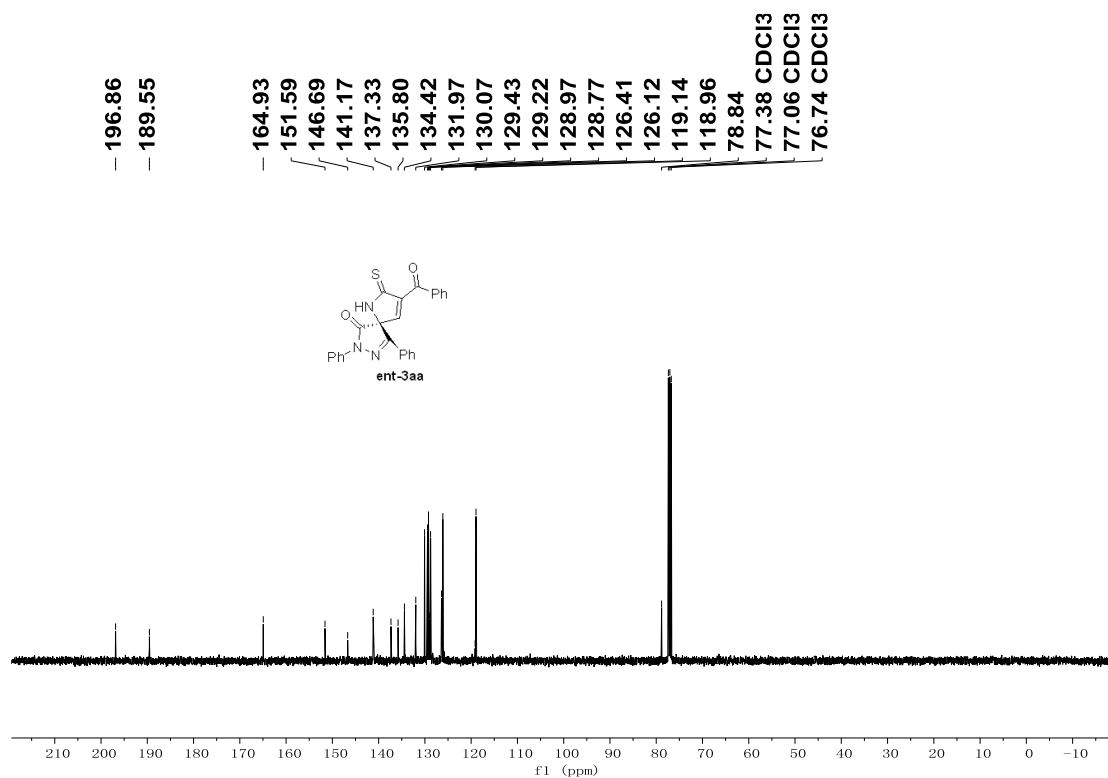

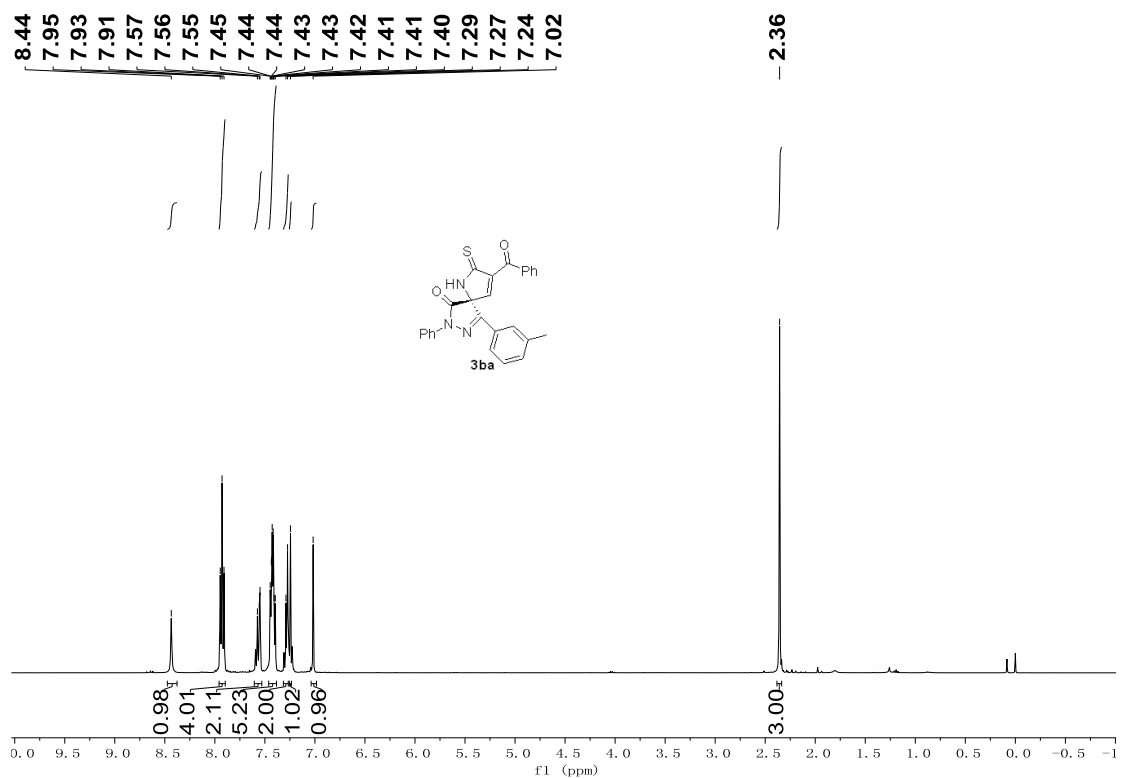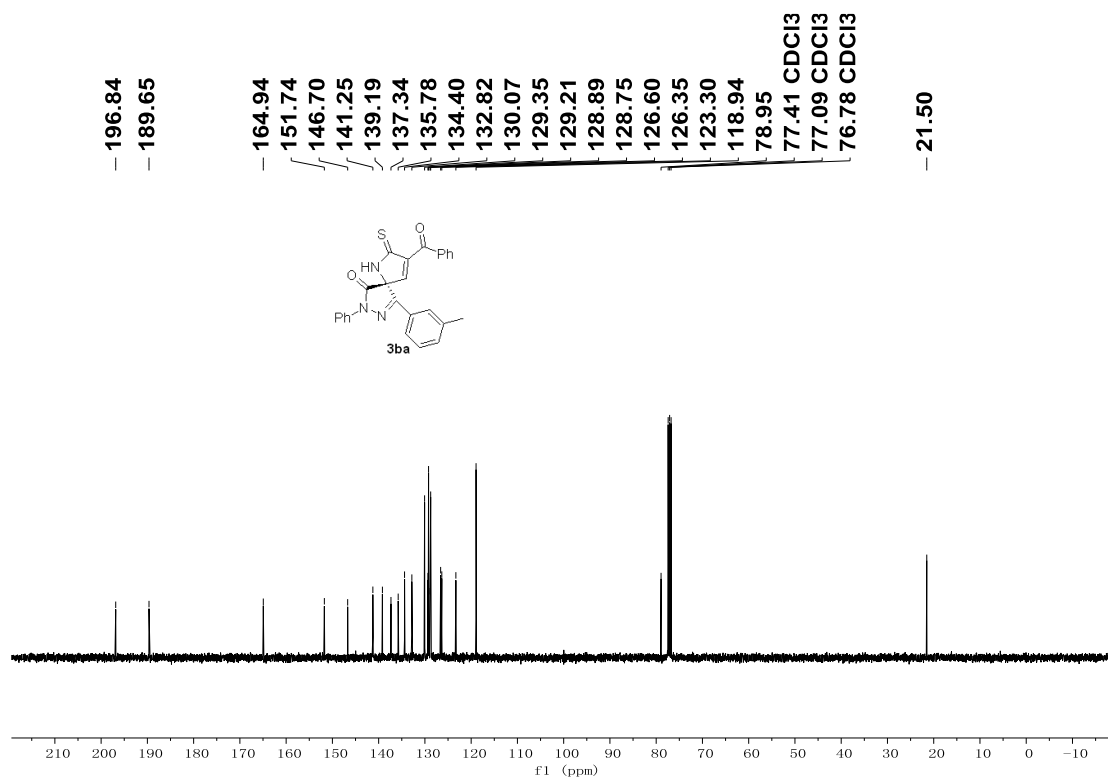



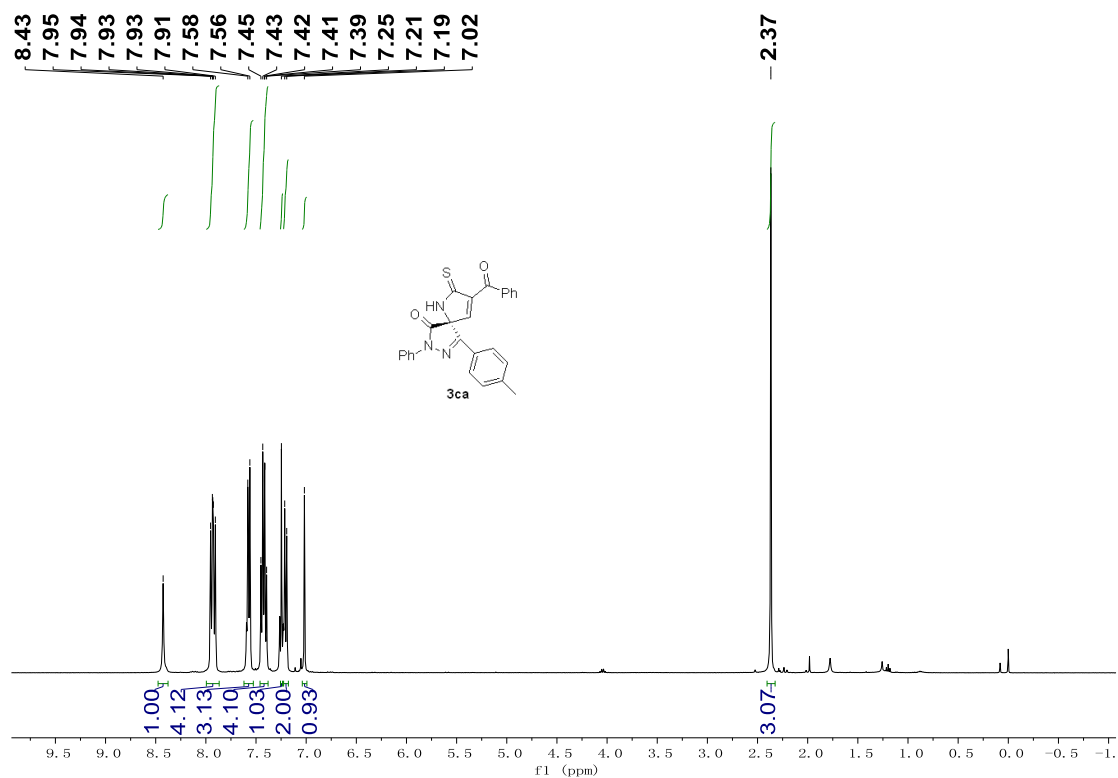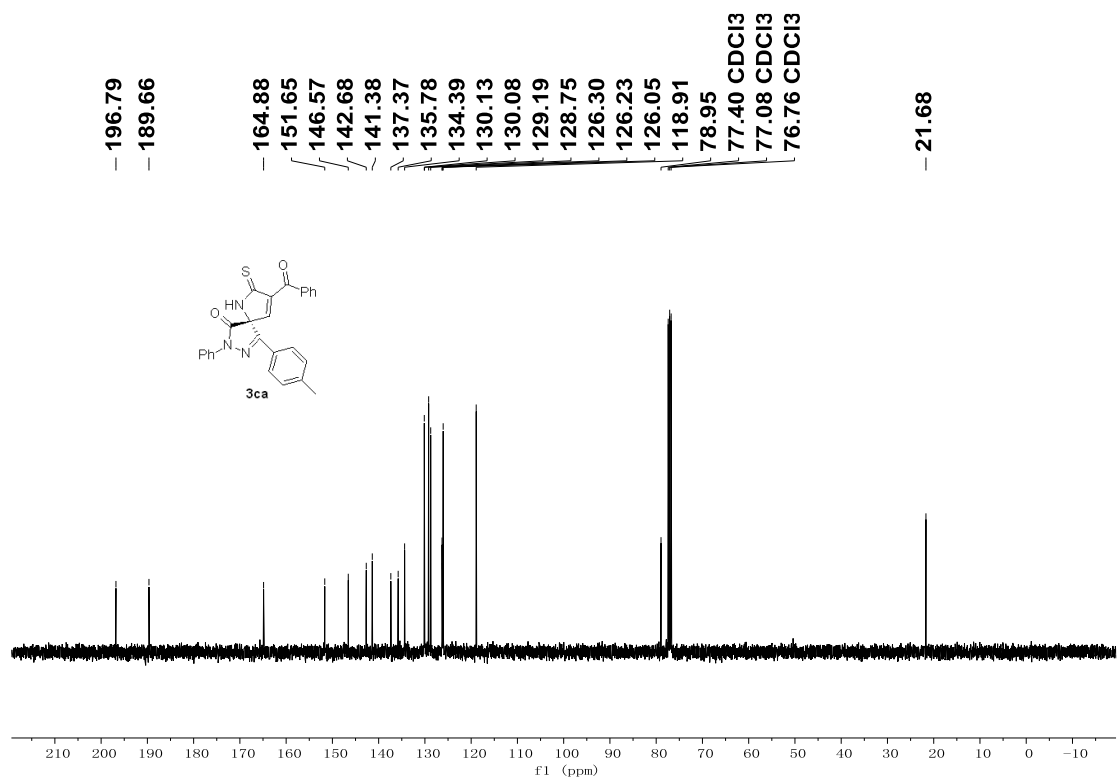

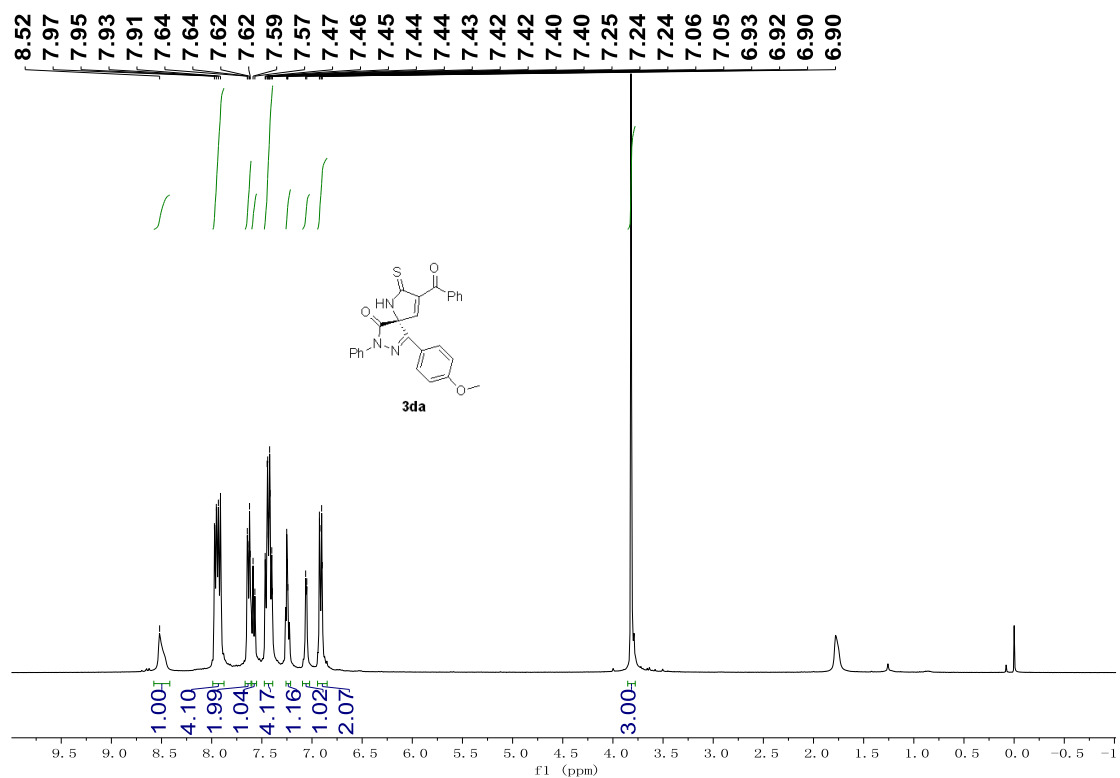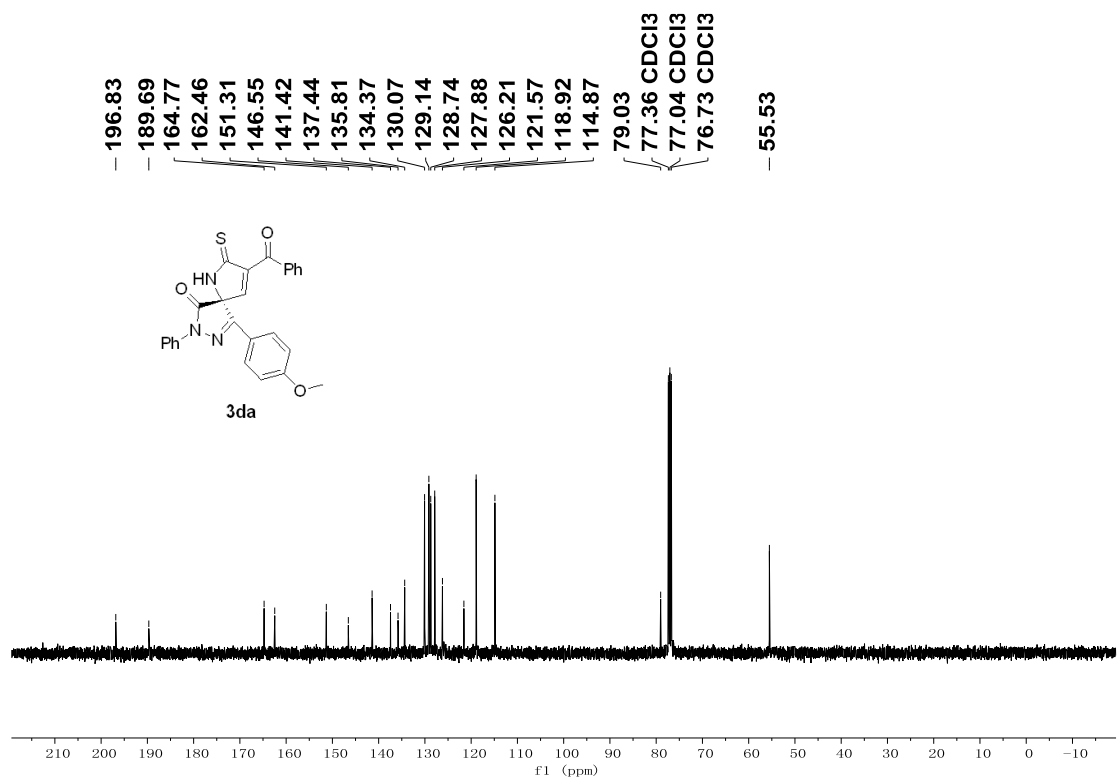

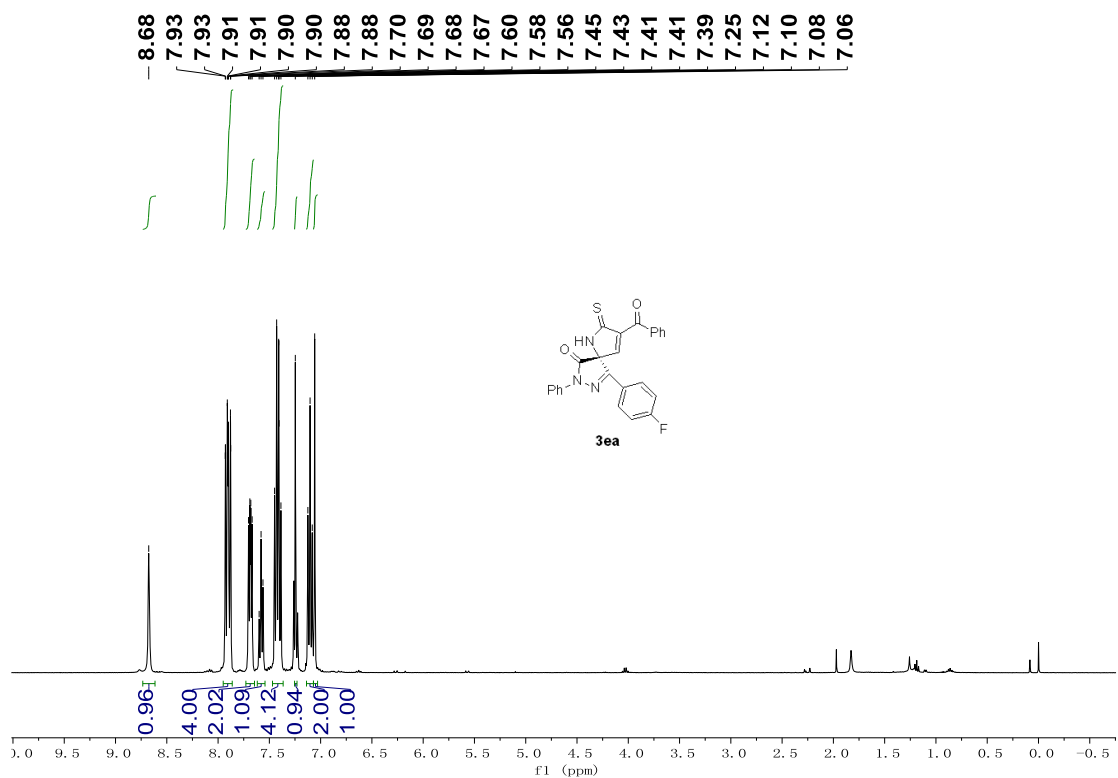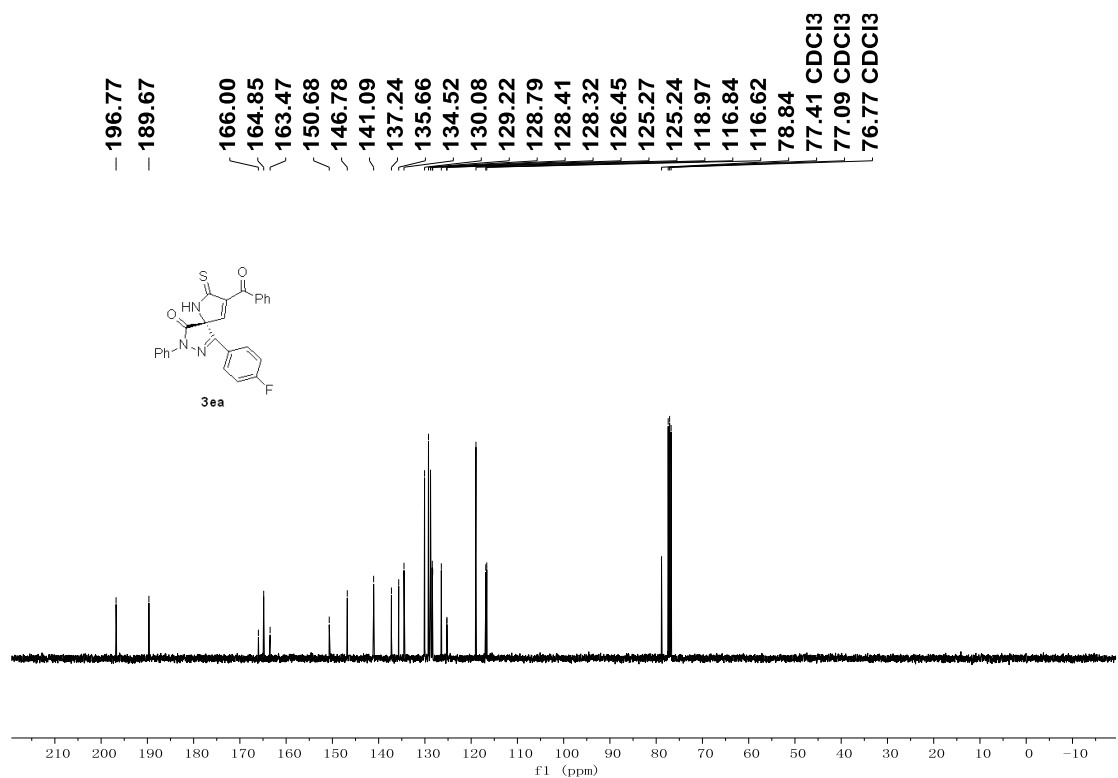

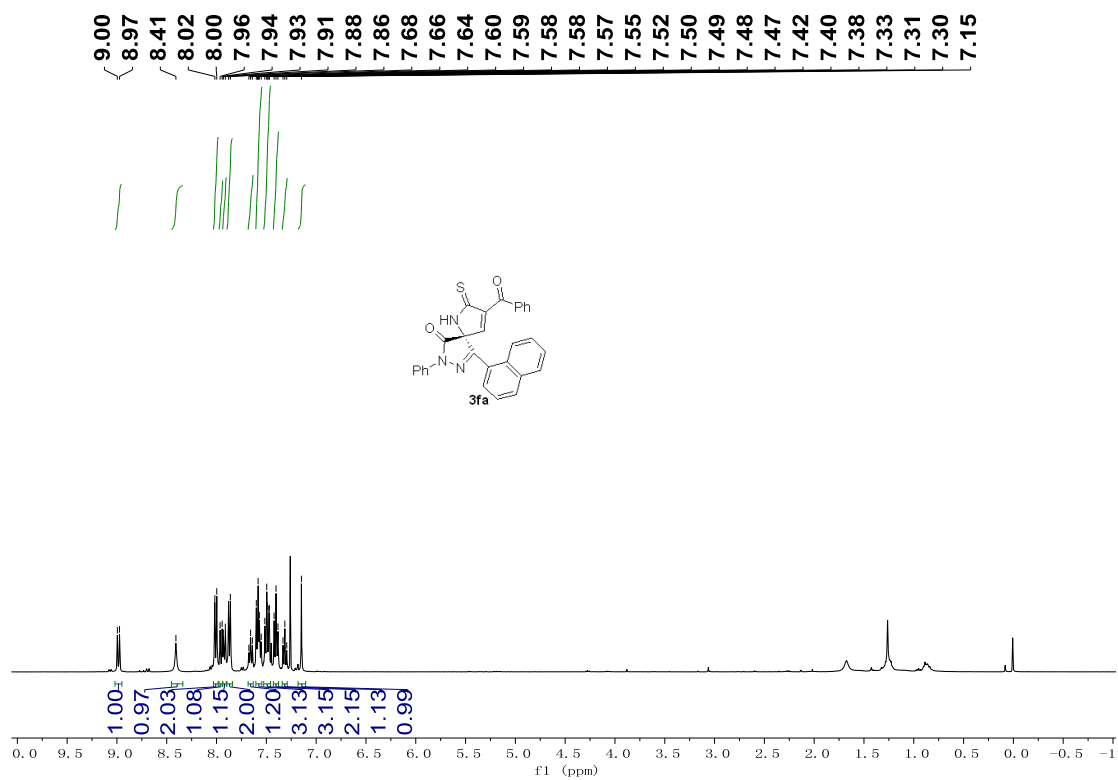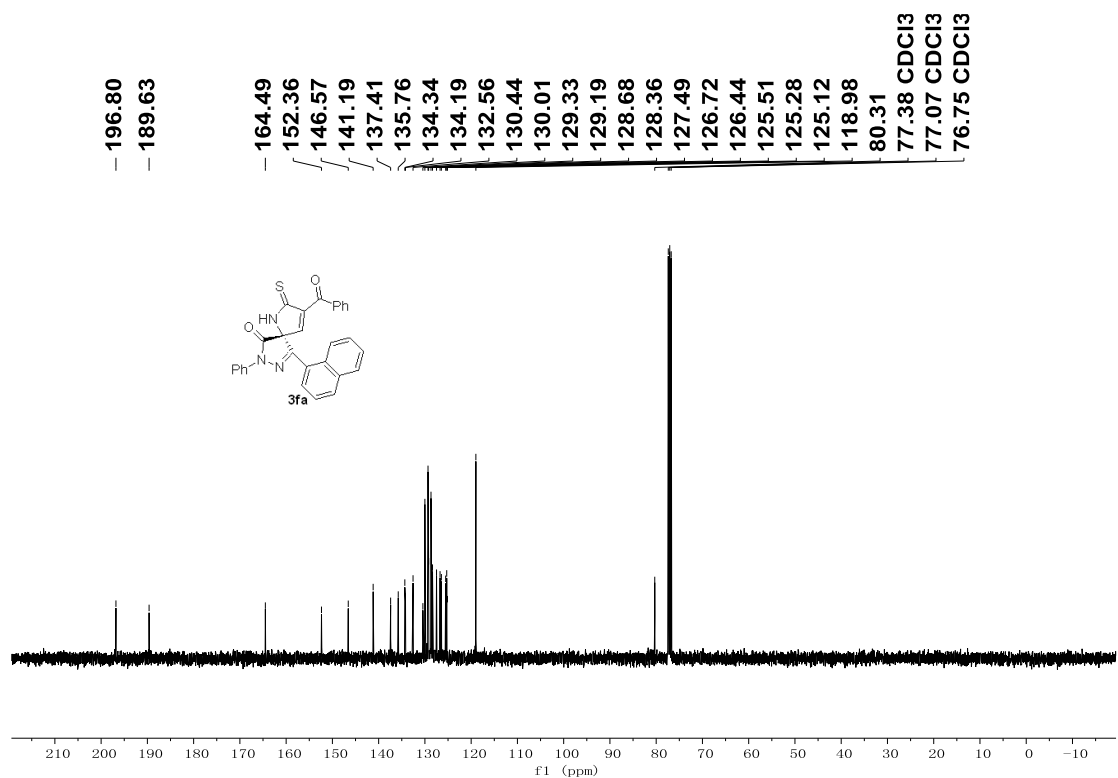

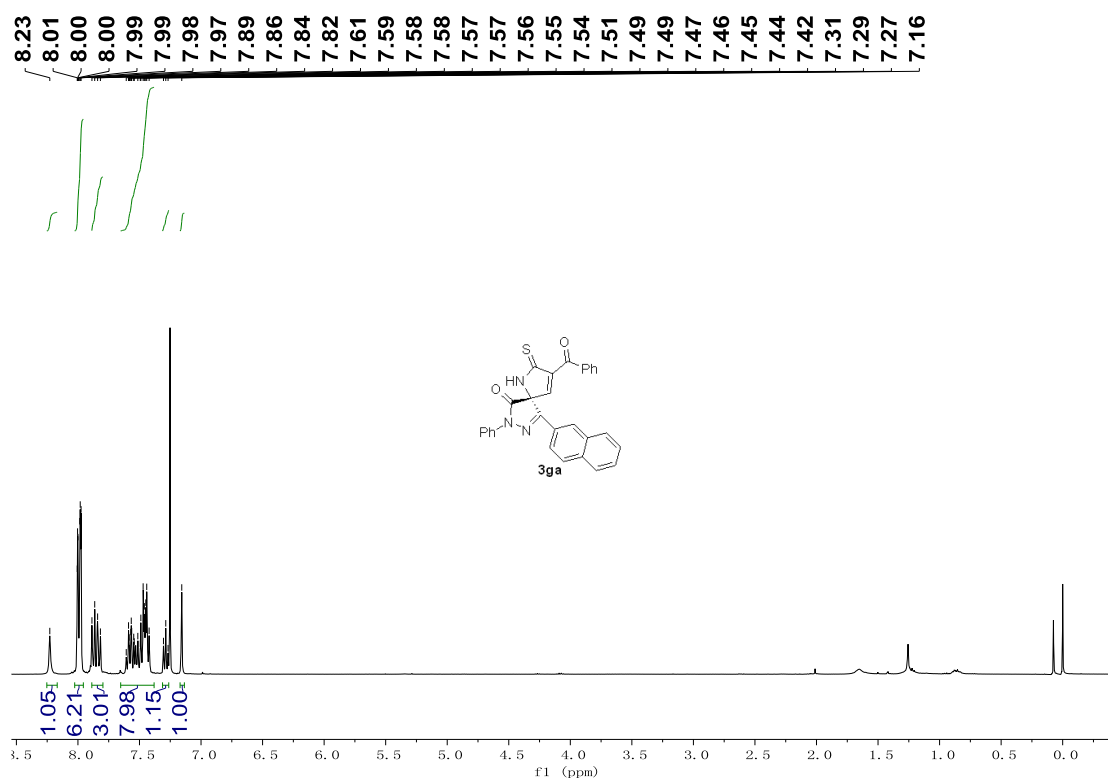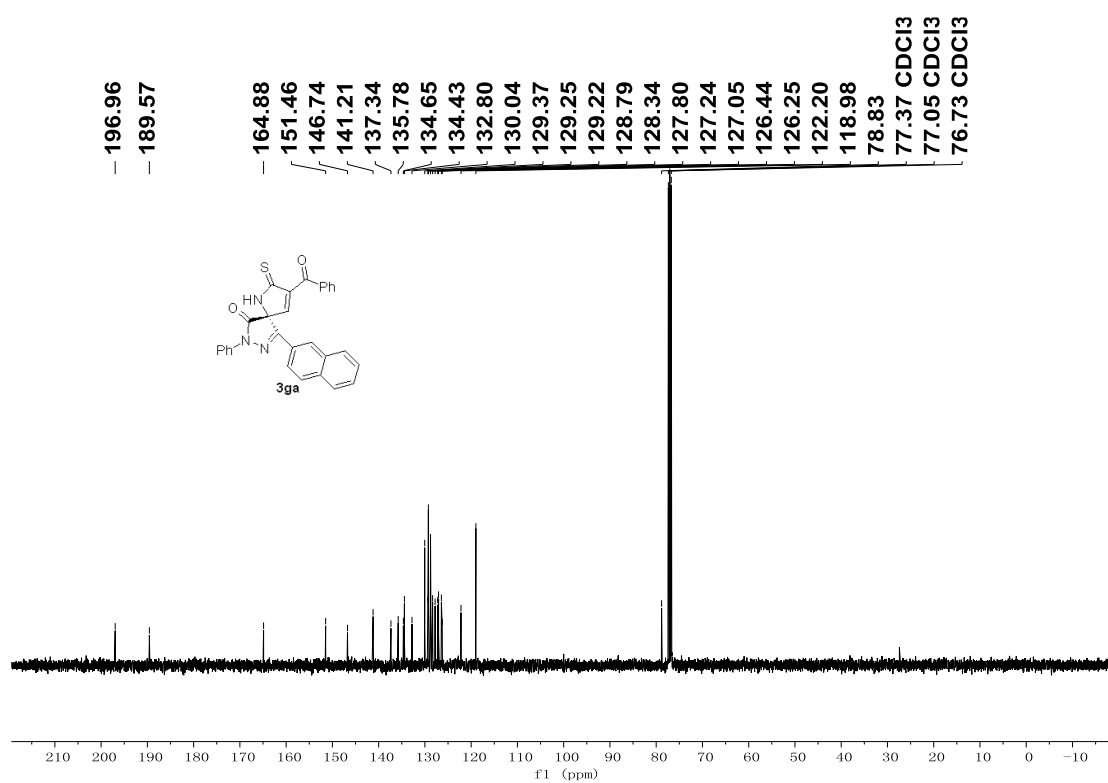

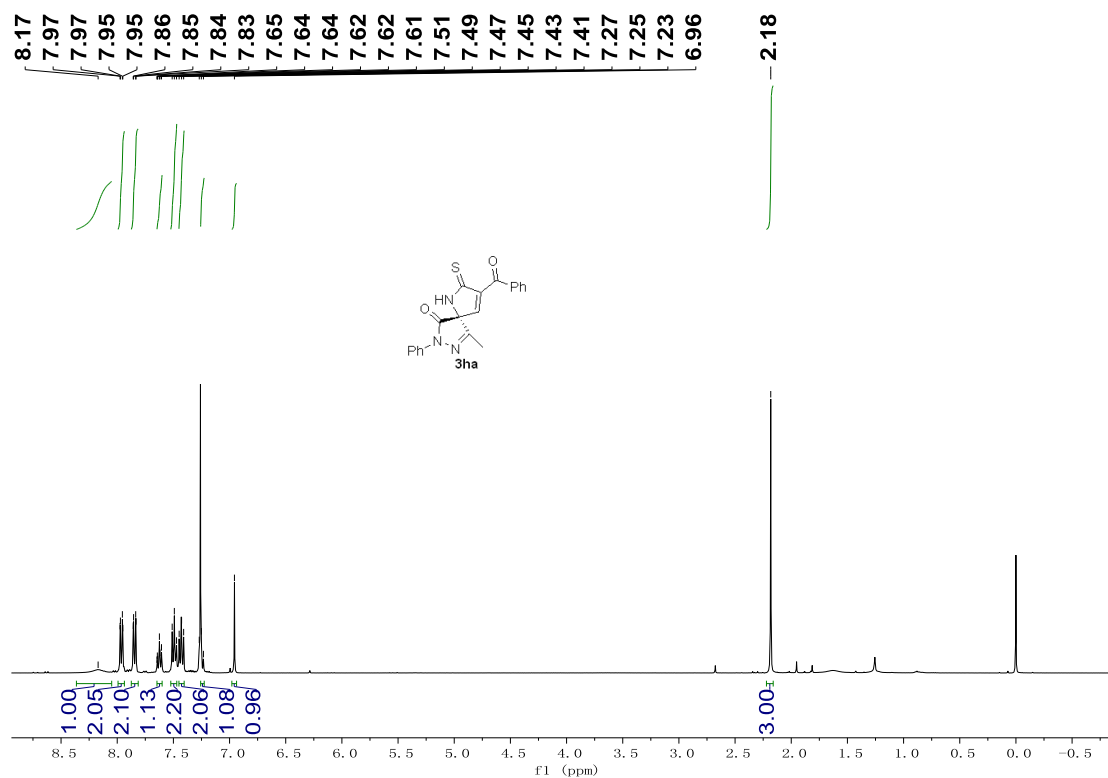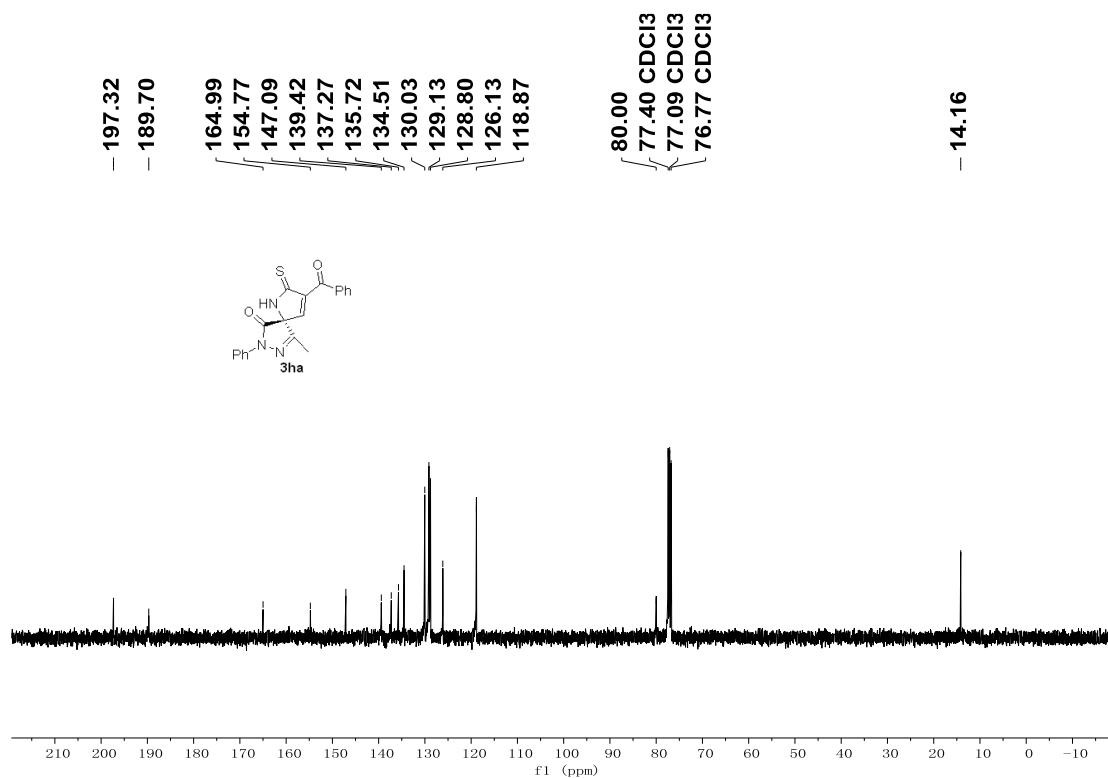

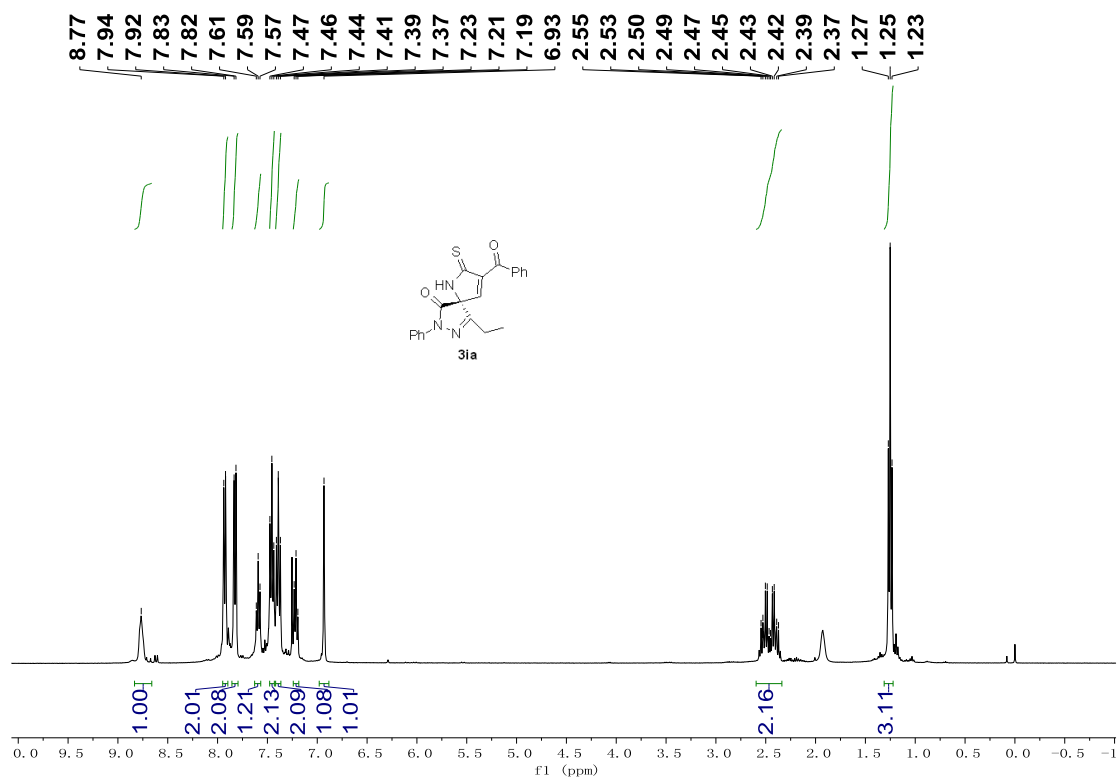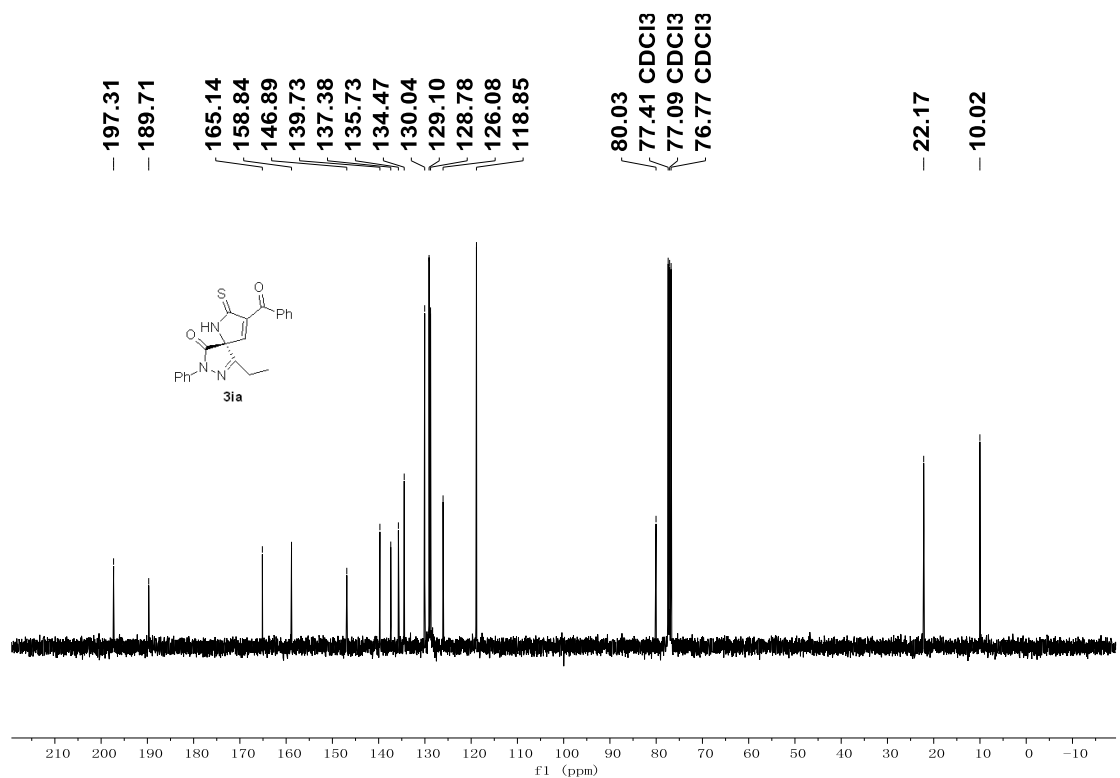

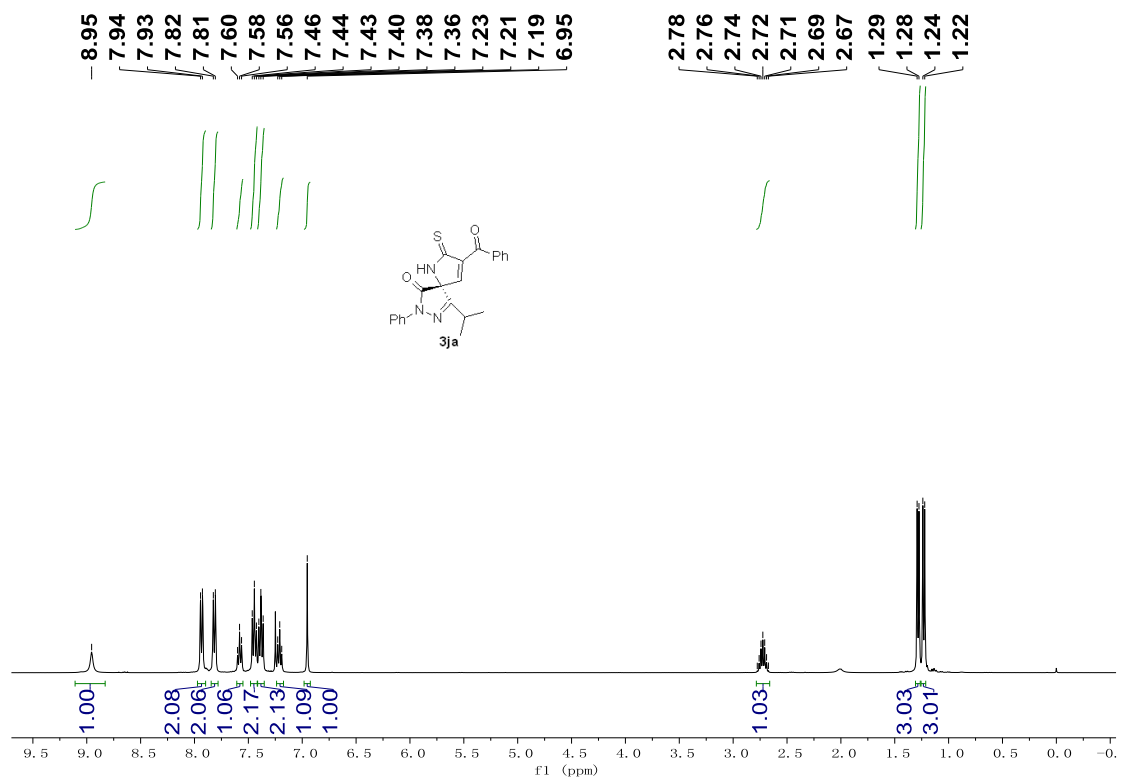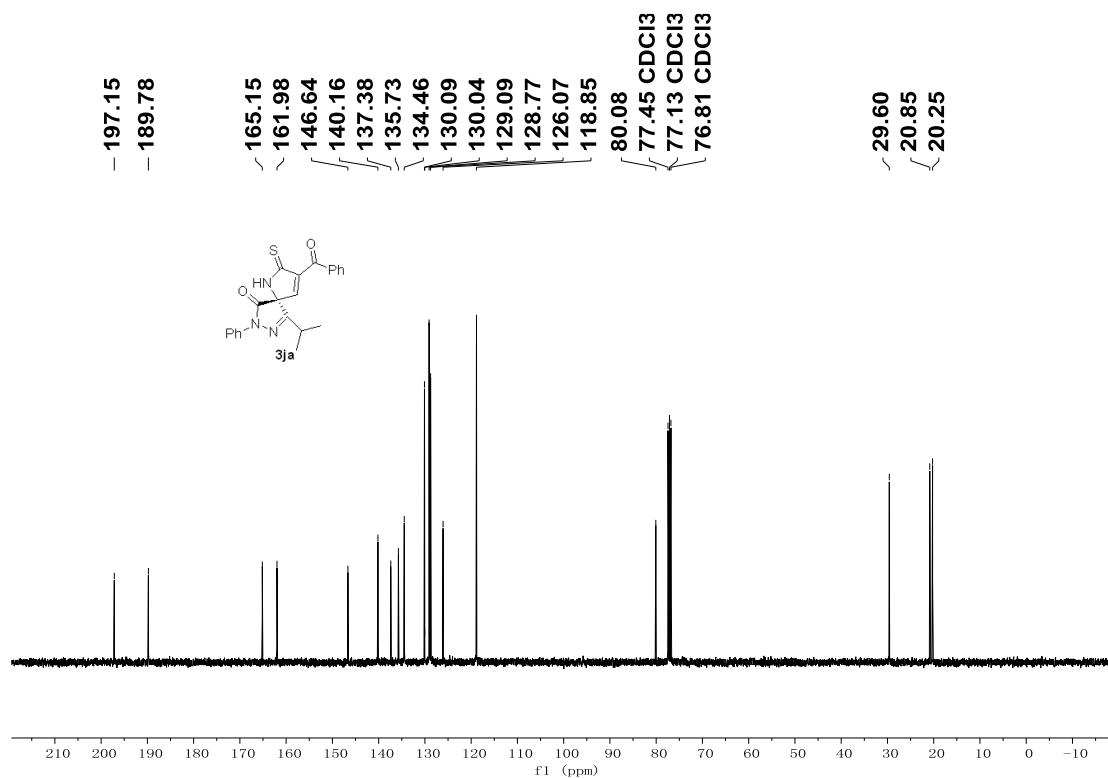



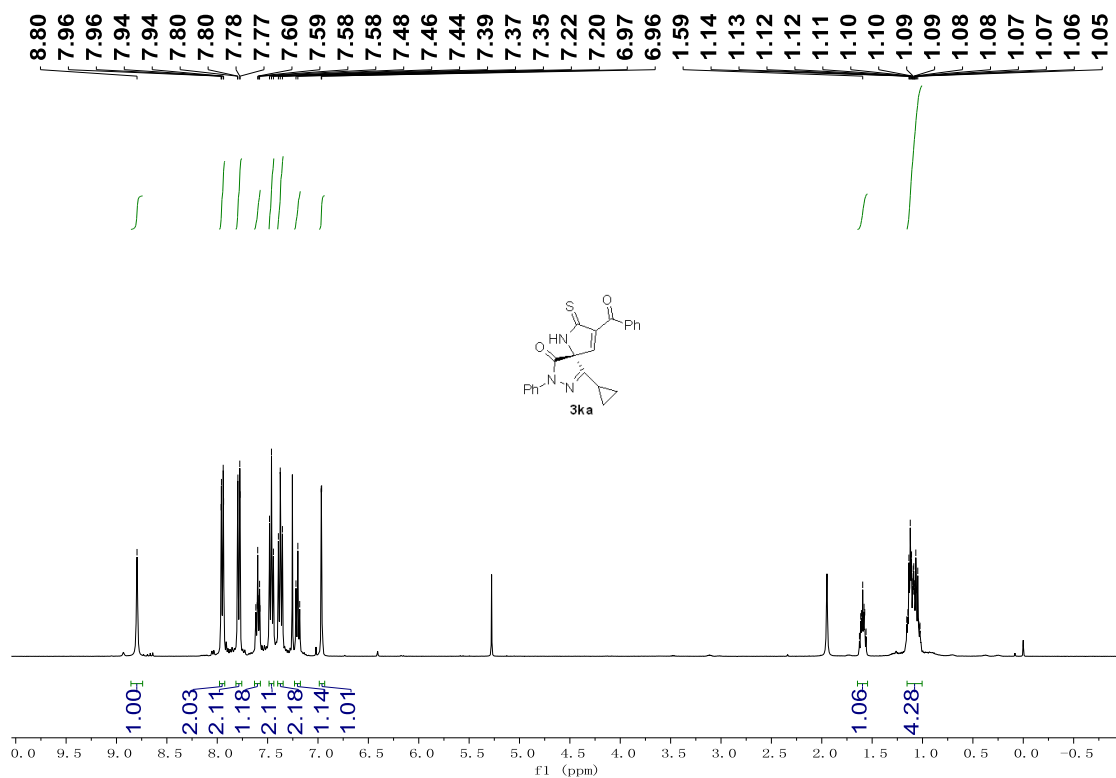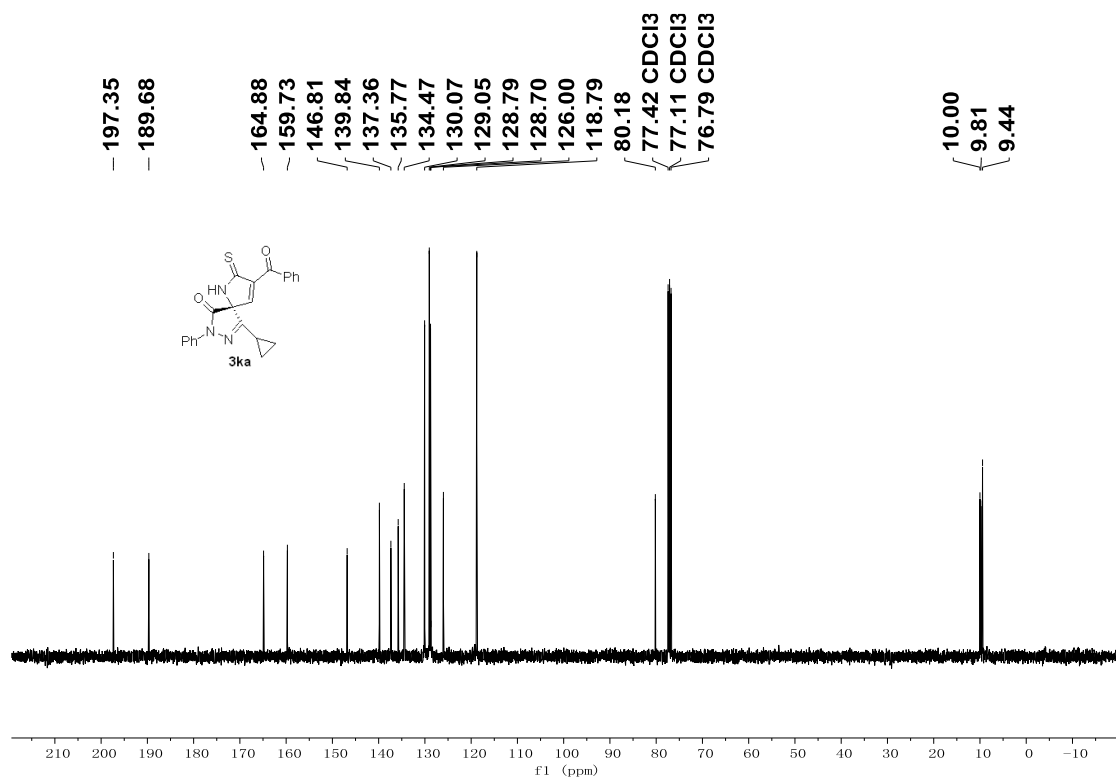

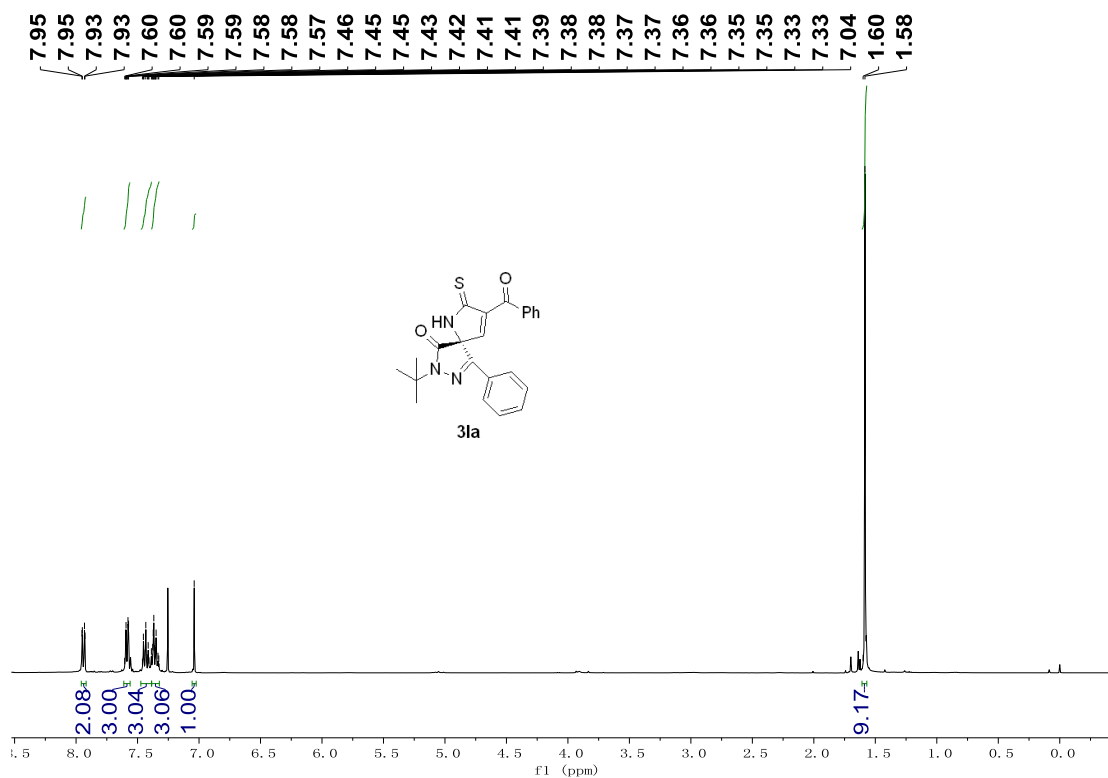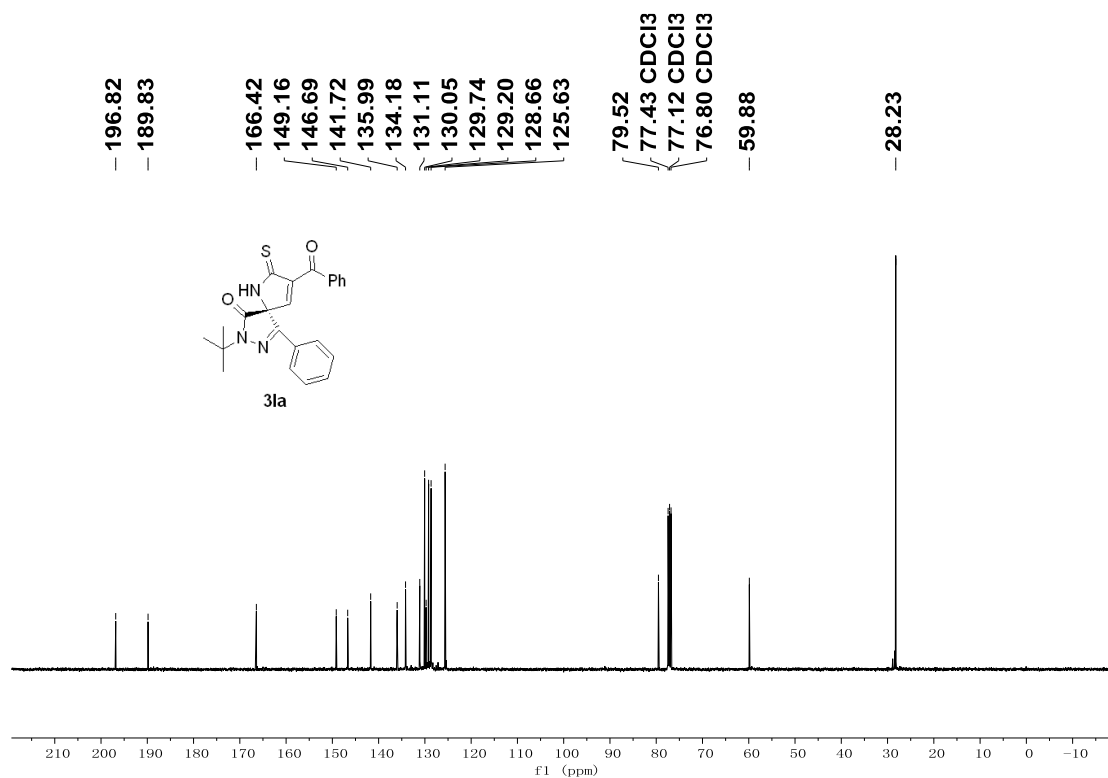

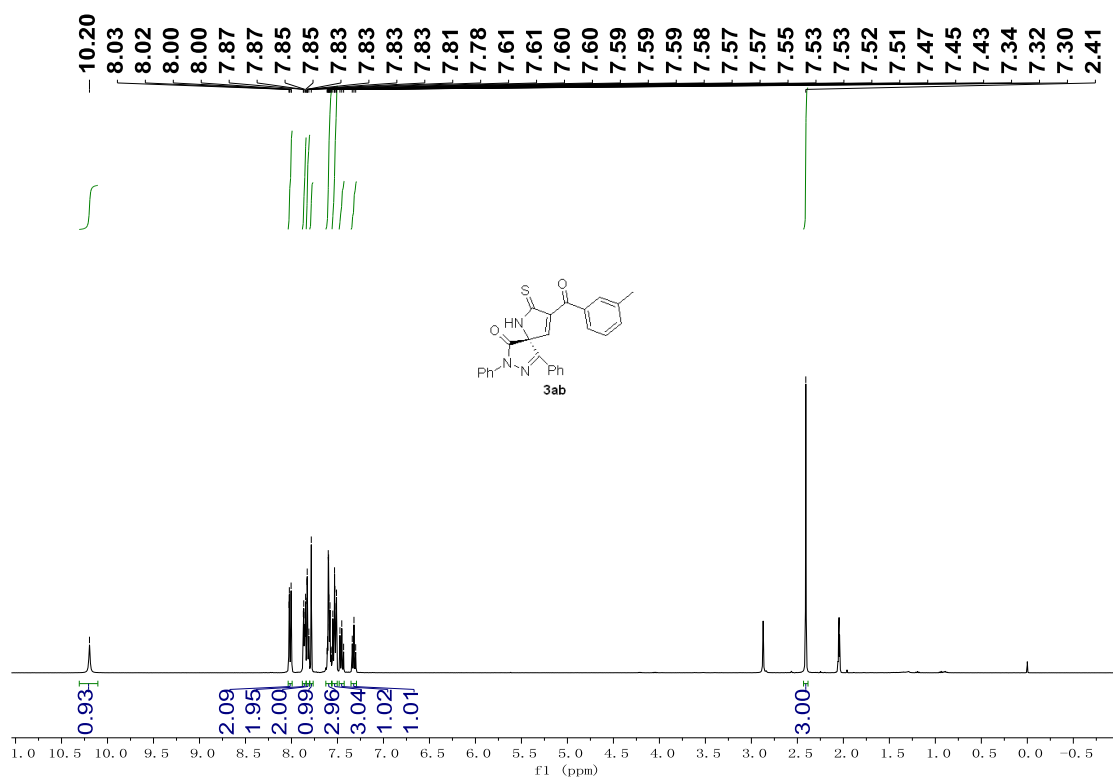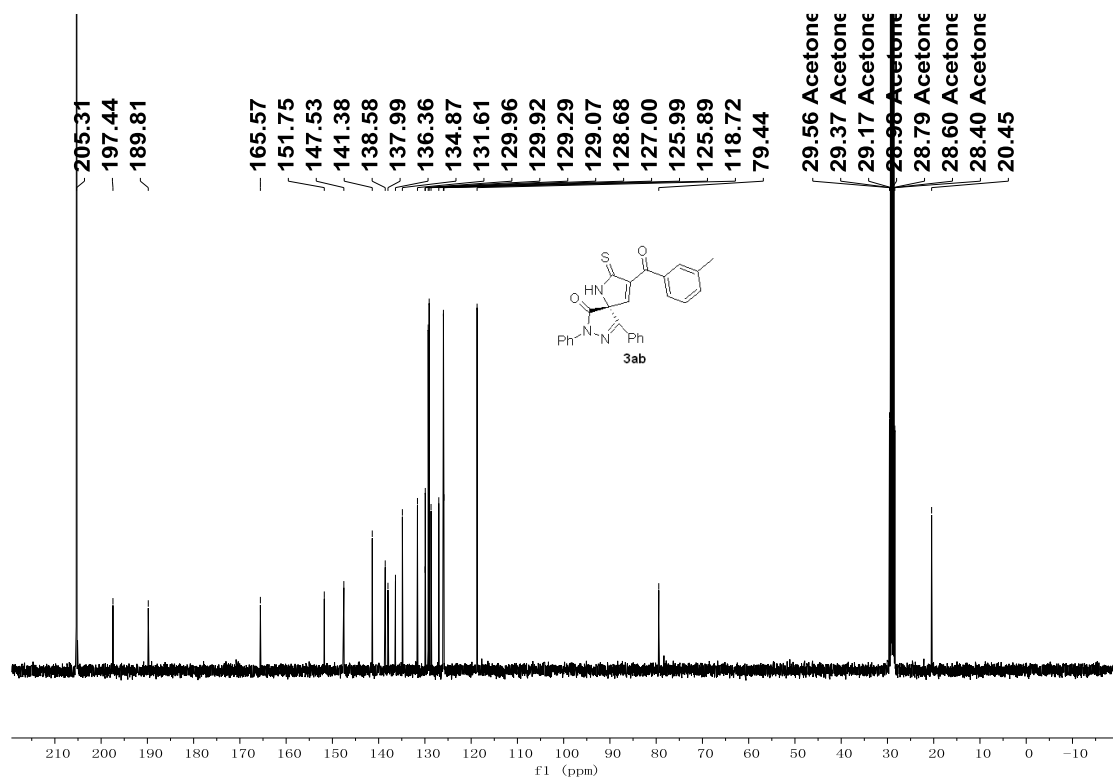

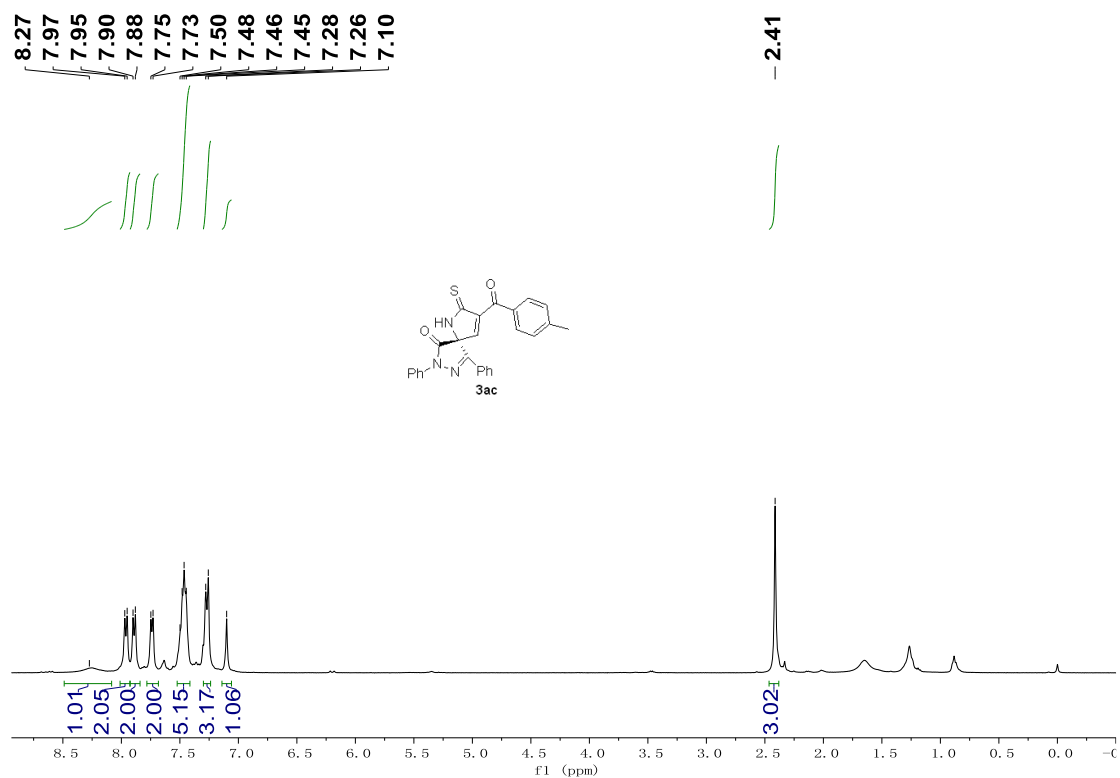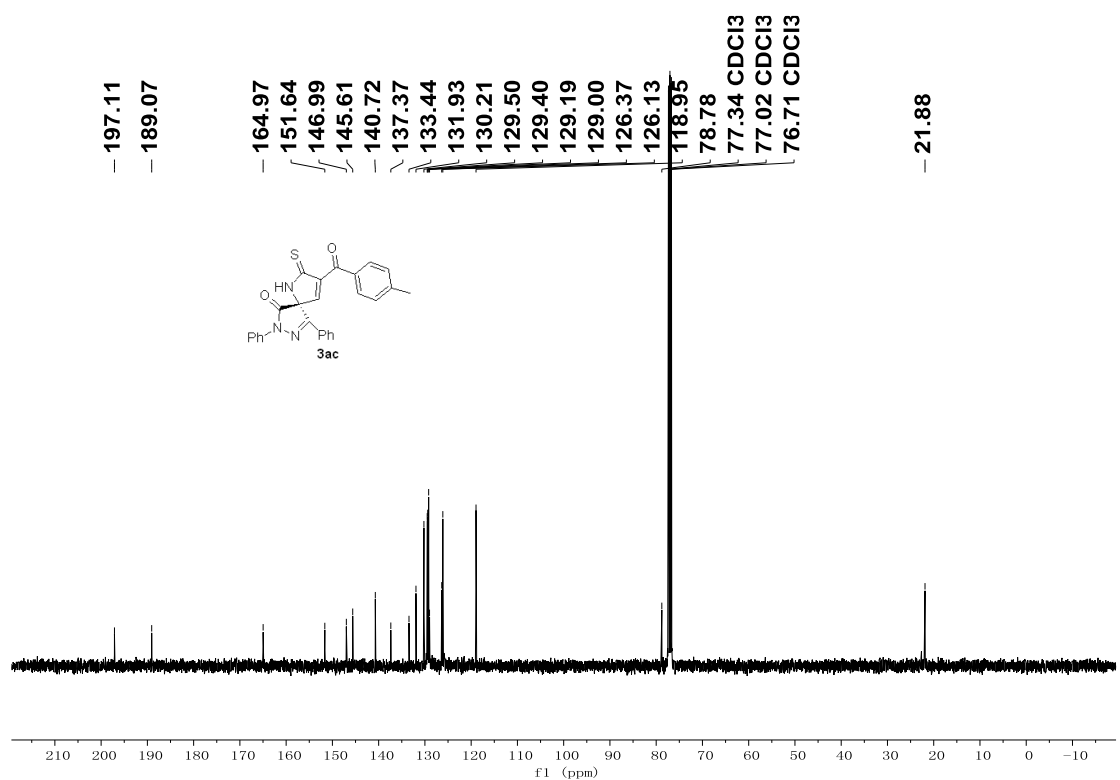

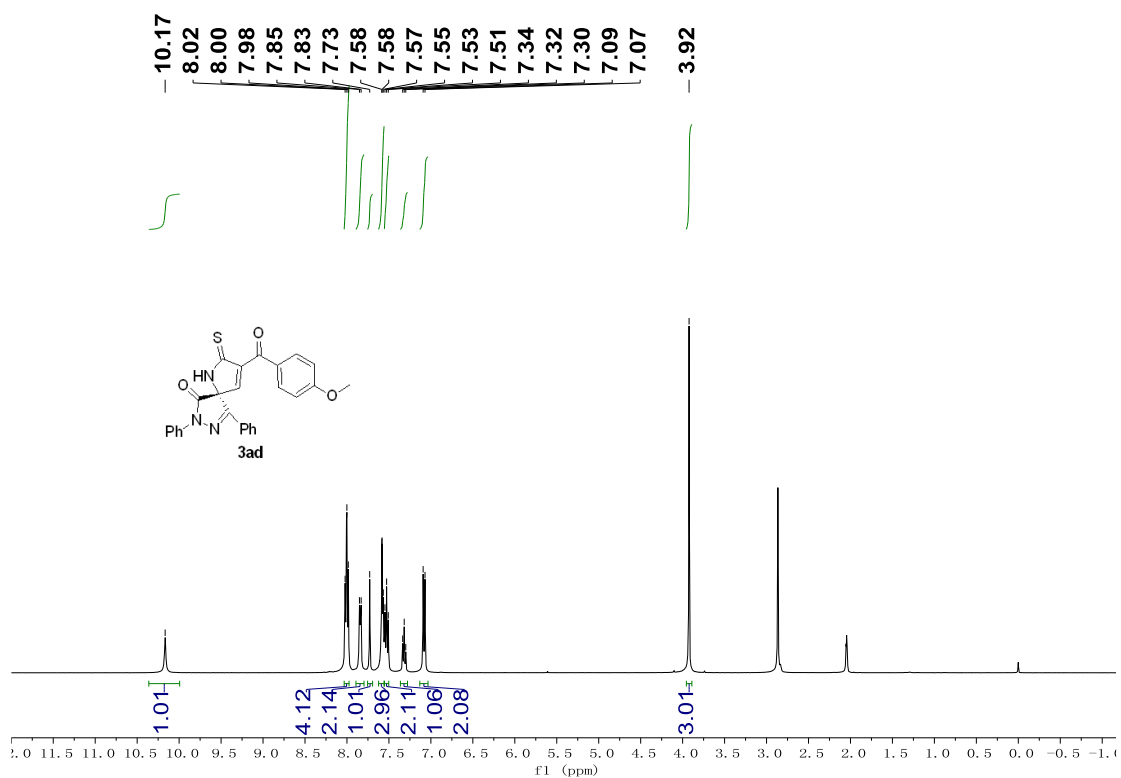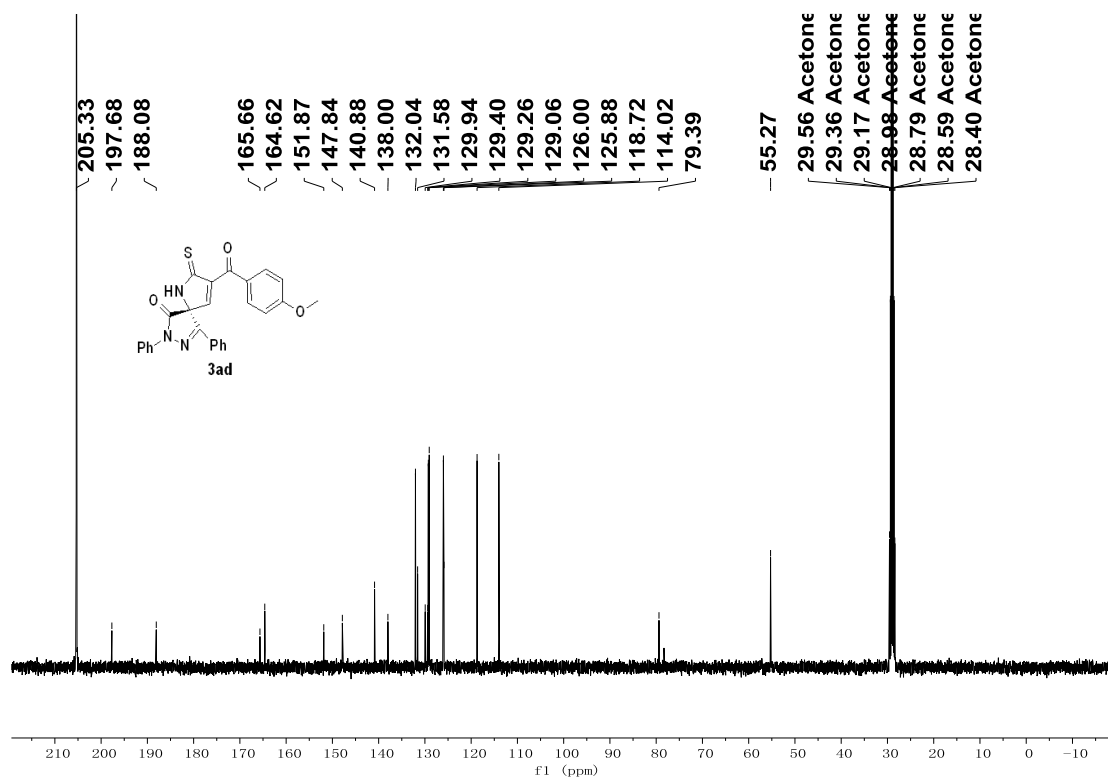

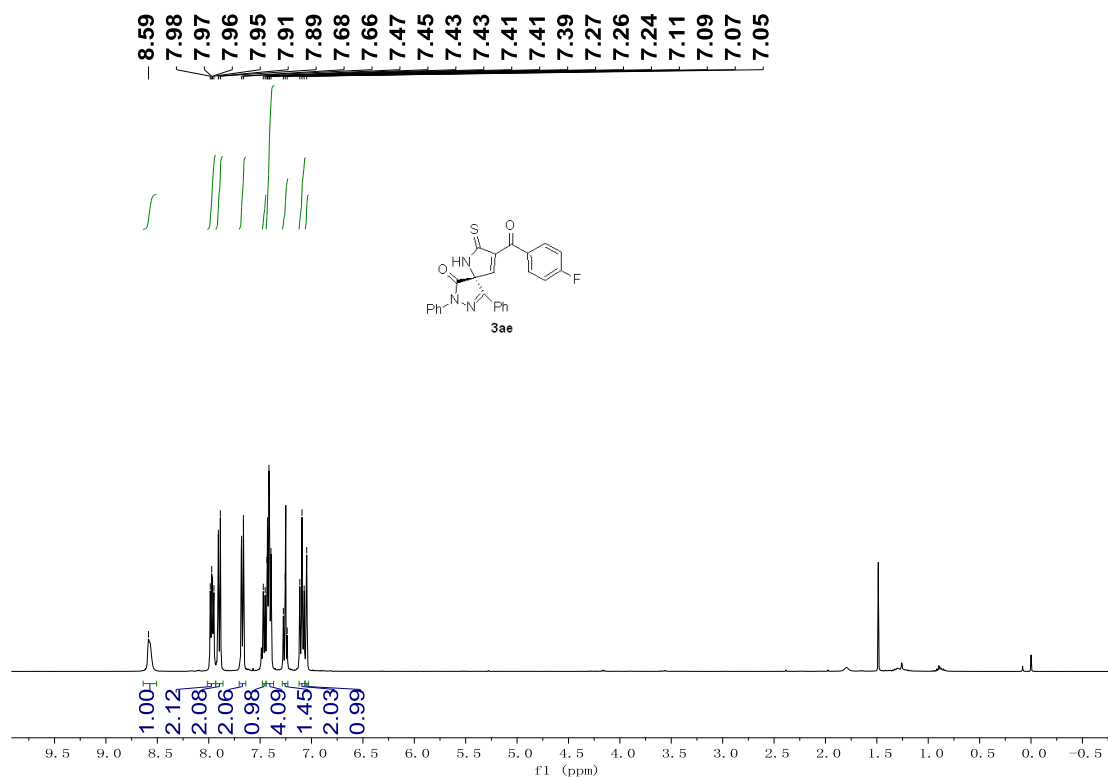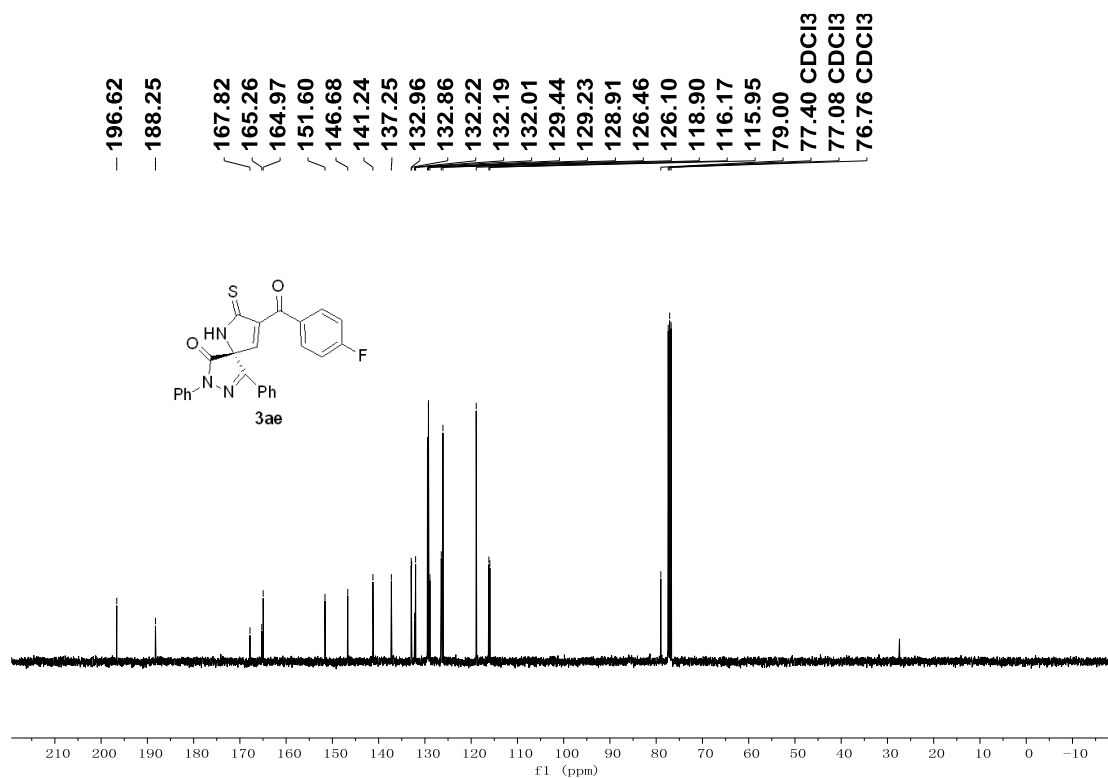

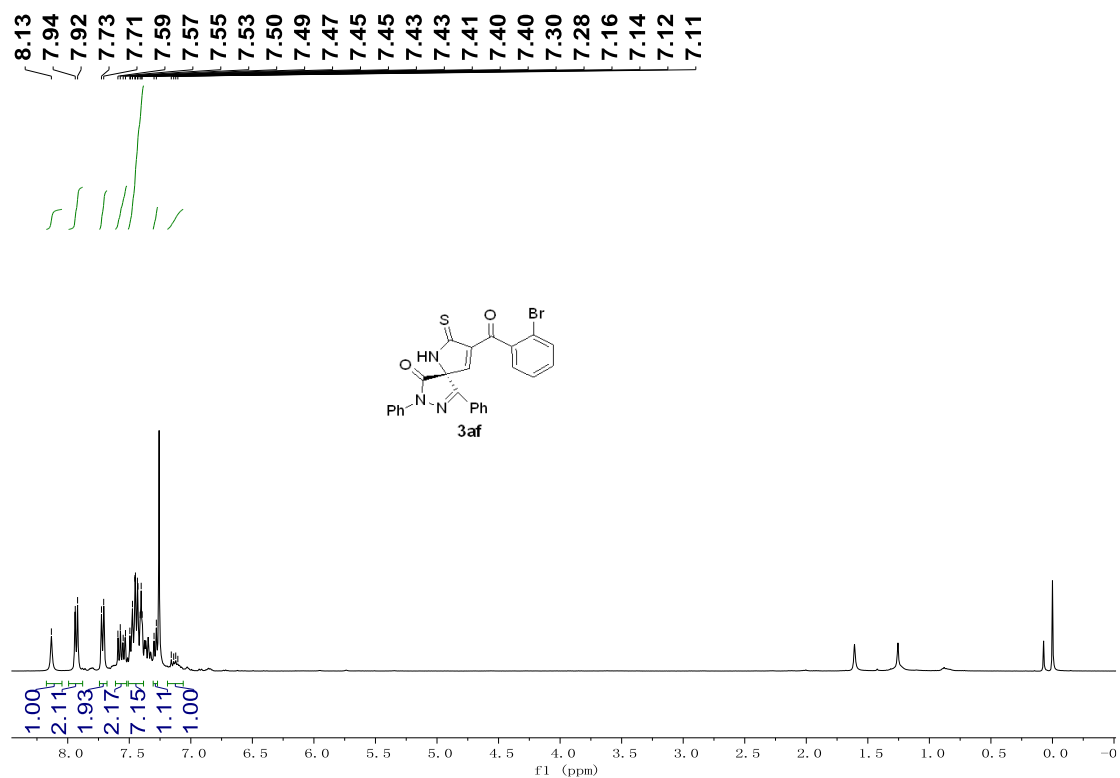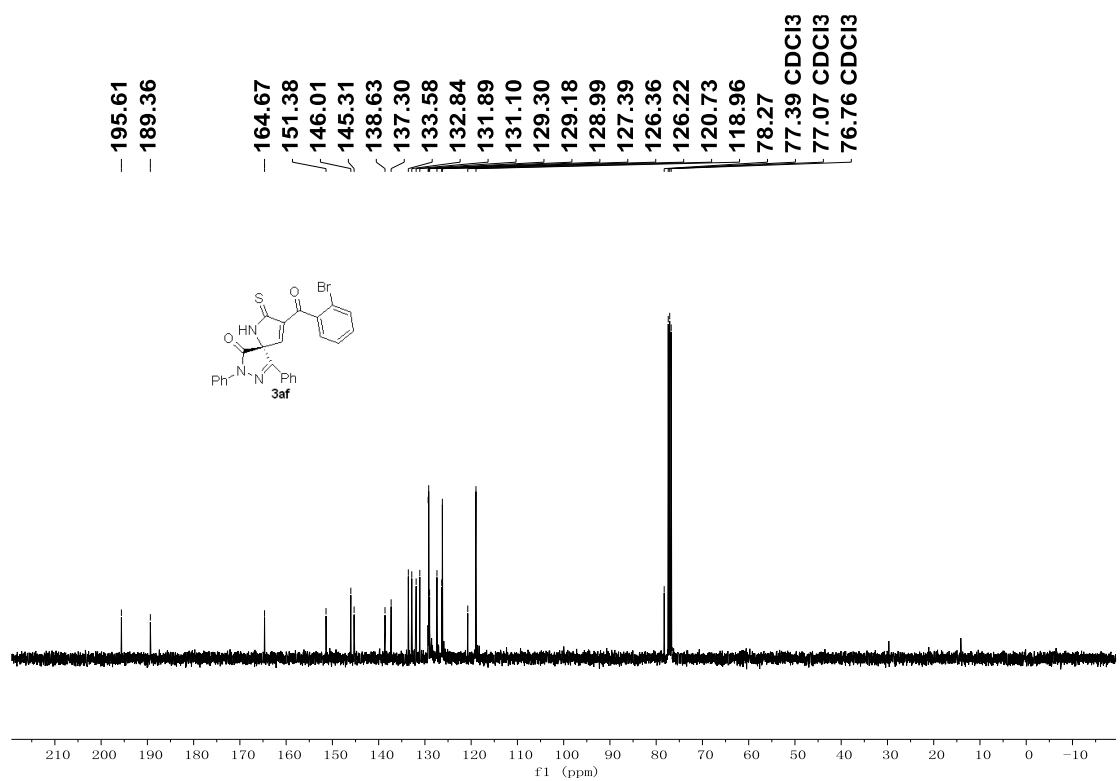

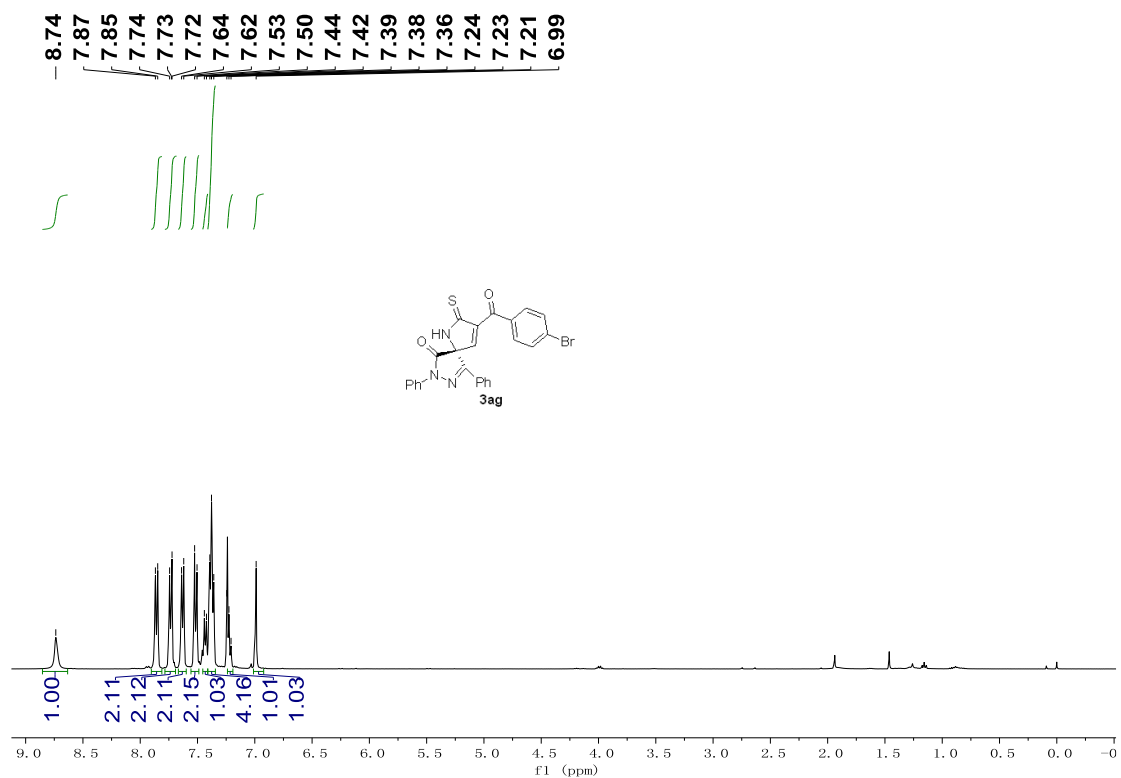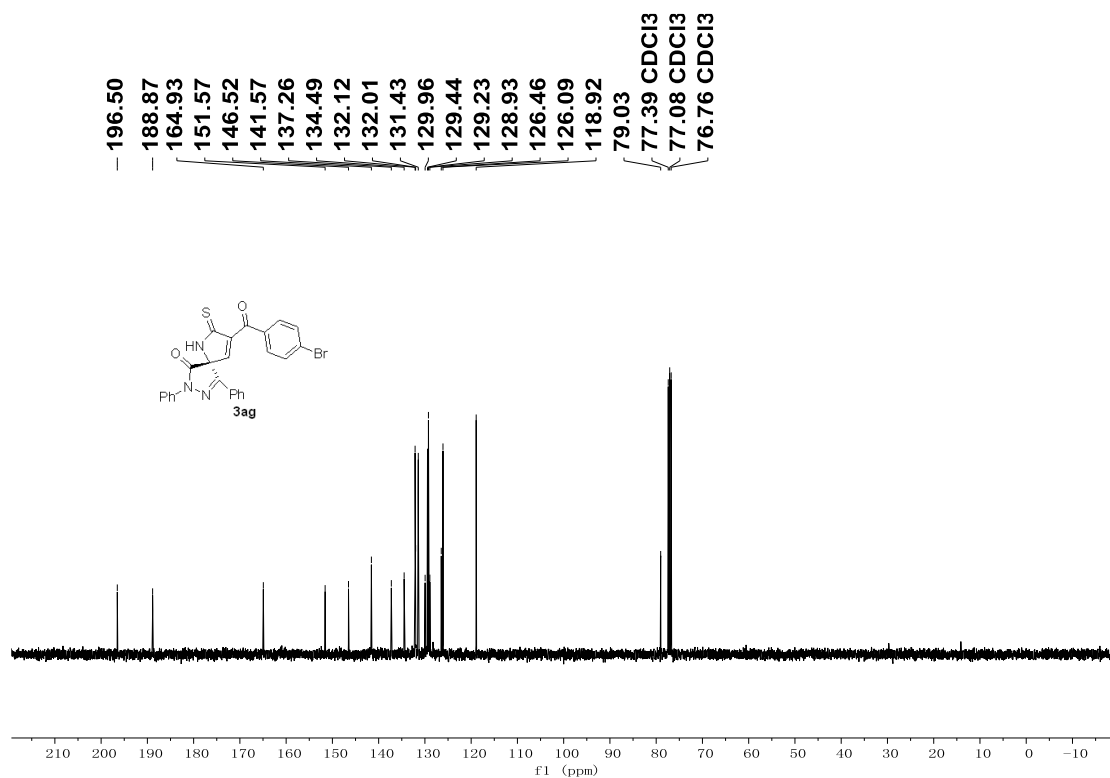



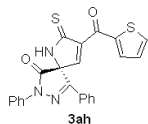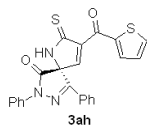

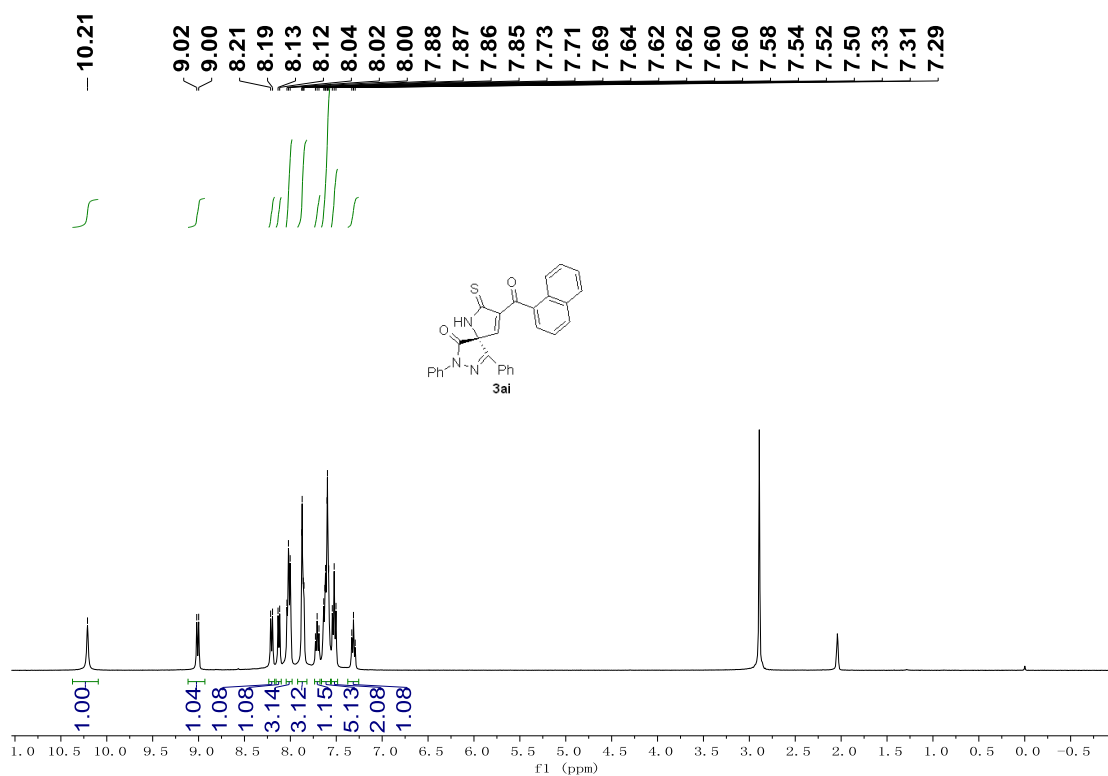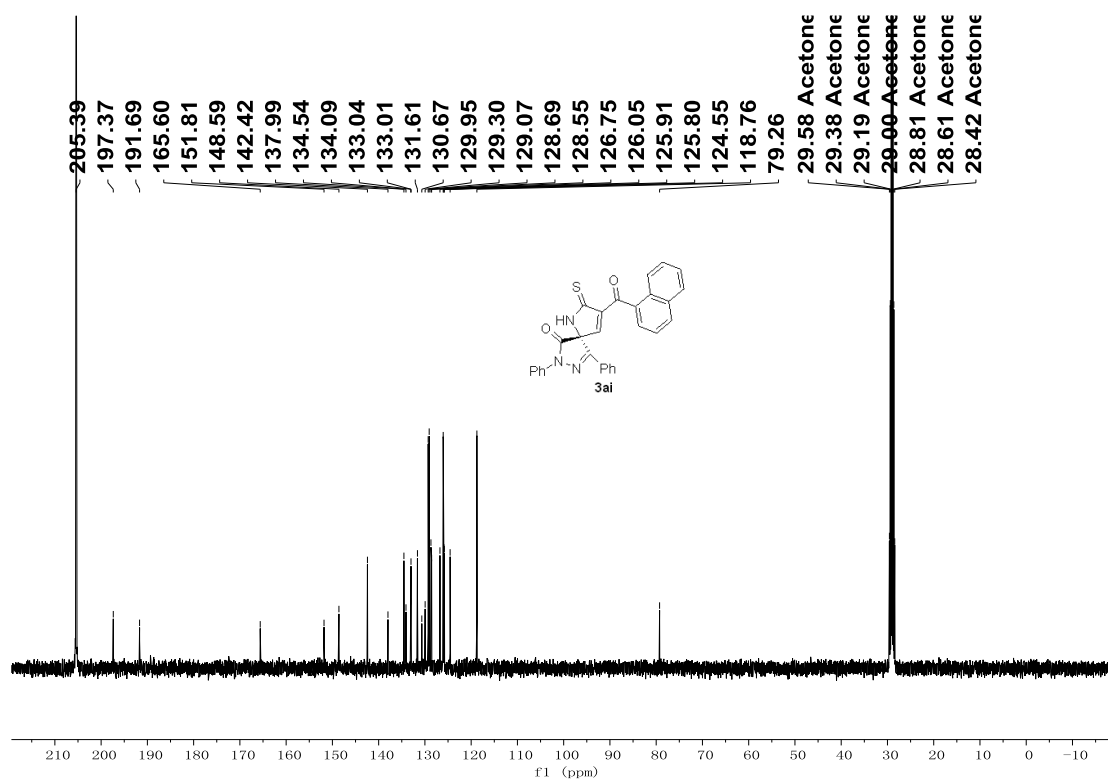

8.14  
8.08  
8.06  
7.94  
7.92  
7.80  
7.78  
7.57  
7.55  
7.54  
7.53  
7.53  
7.49  
7.48  
7.47  
7.46  
7.45  
7.44  
7.44  
7.43  
7.42  
7.32  
7.30  
7.29  
7.22  
7.21  
7.21  
7.20  
7.19  
7.18  
7.15  
7.15  
7.14  
7.13  
7.13  
7.12  
7.11  
7.10

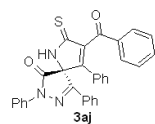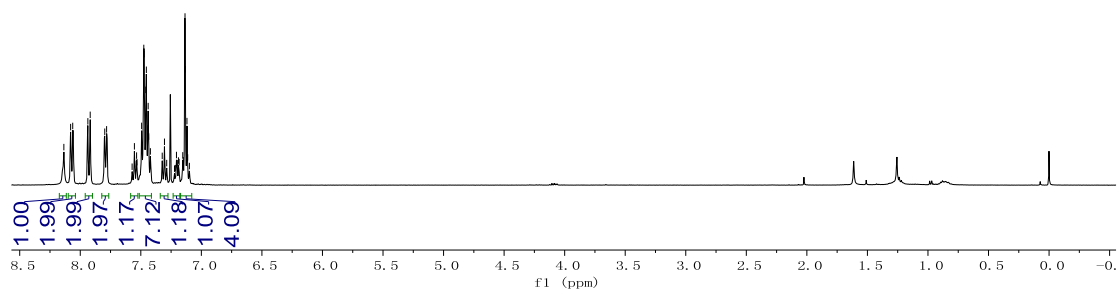

195.61  
189.36  
164.67  
151.38  
146.01  
145.31  
138.63  
137.30  
133.58  
132.84  
131.89  
131.10  
129.30  
129.18  
128.99  
127.39  
126.36  
126.22  
120.73  
118.96  
78.27  
77.39 CDCl3  
77.07 CDCl3  
76.76 CDCl3

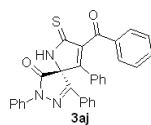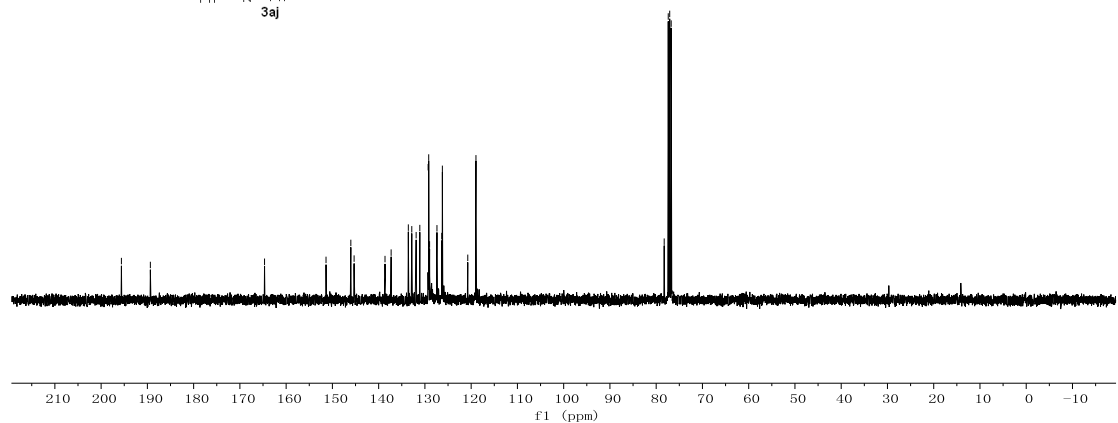

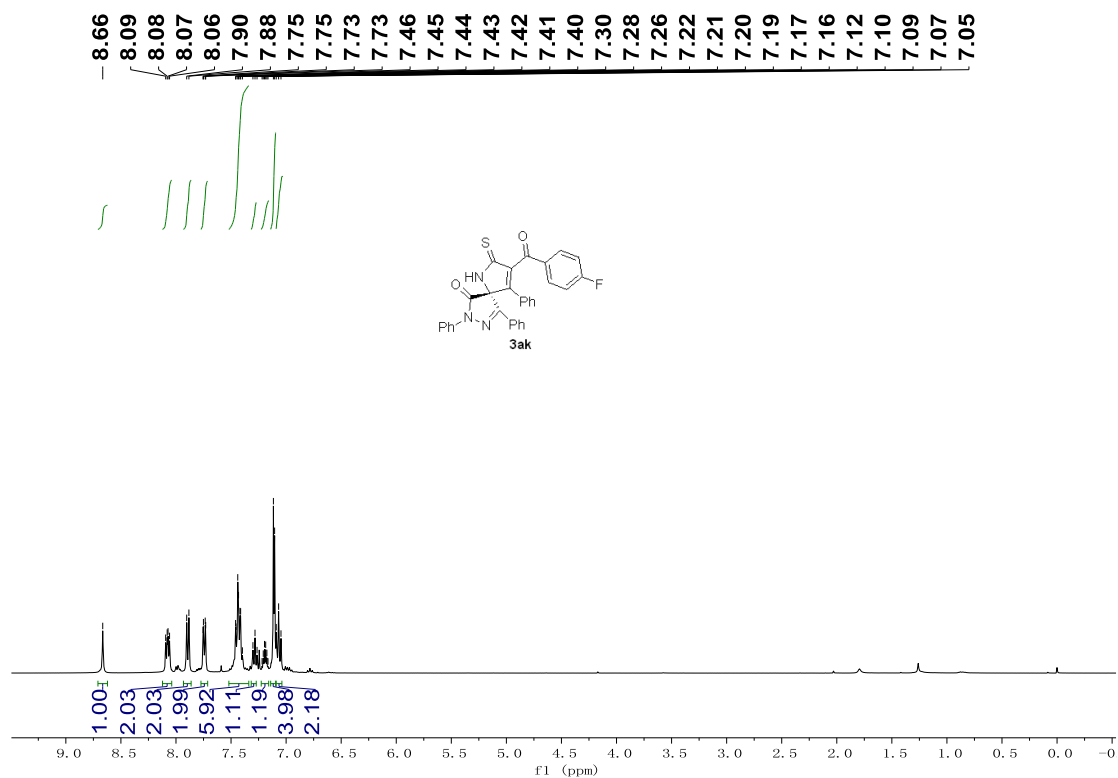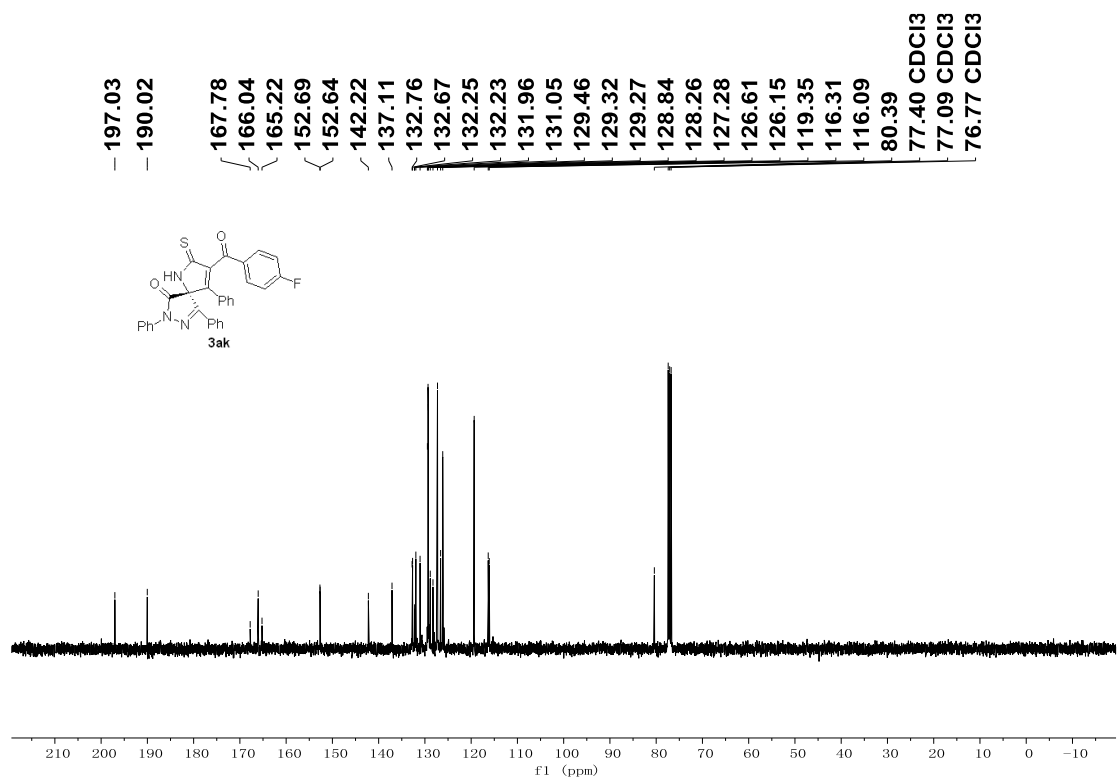

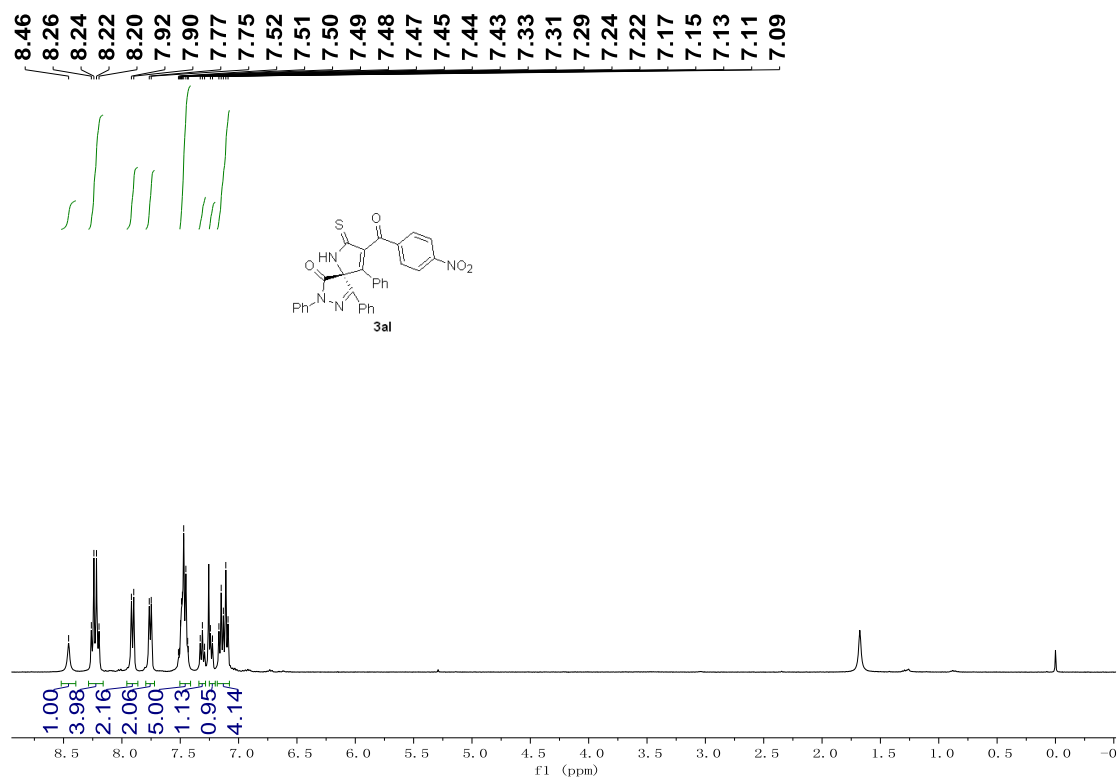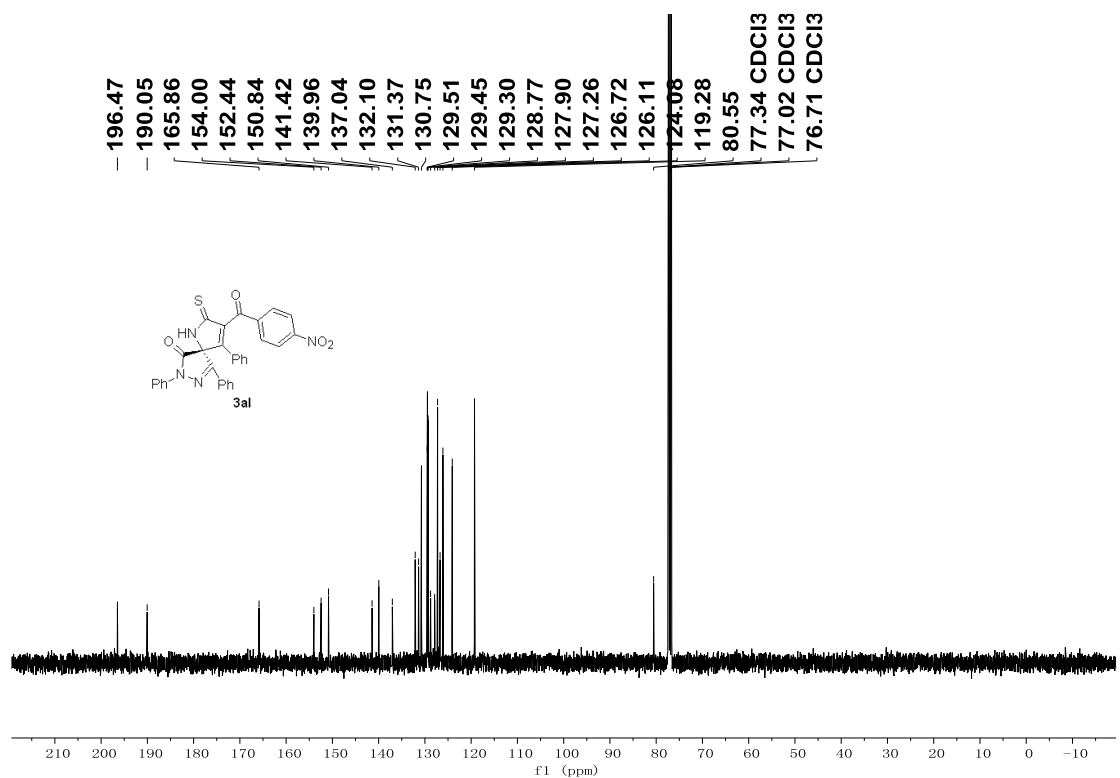

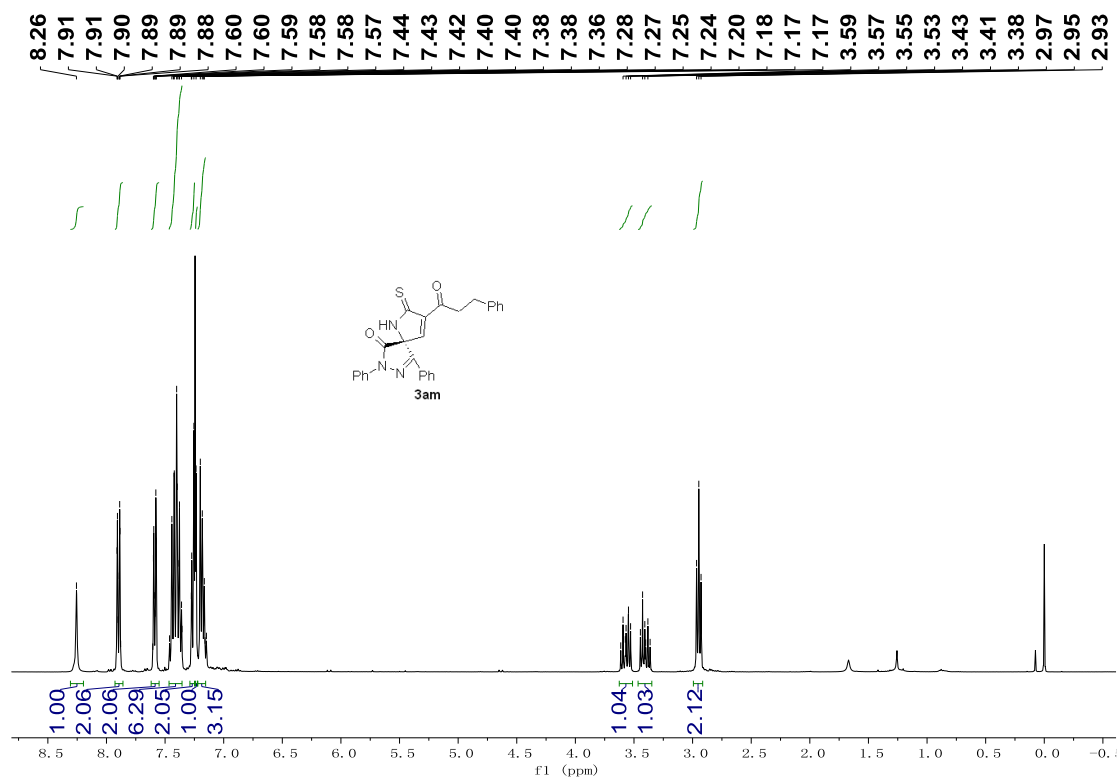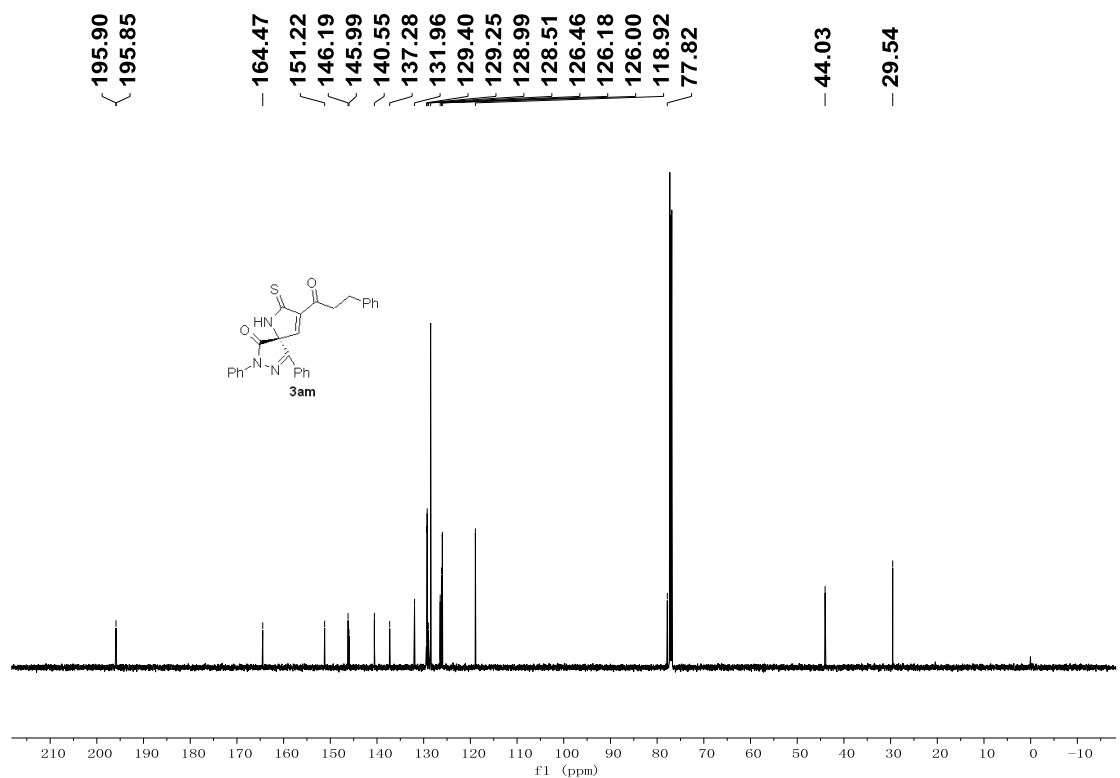

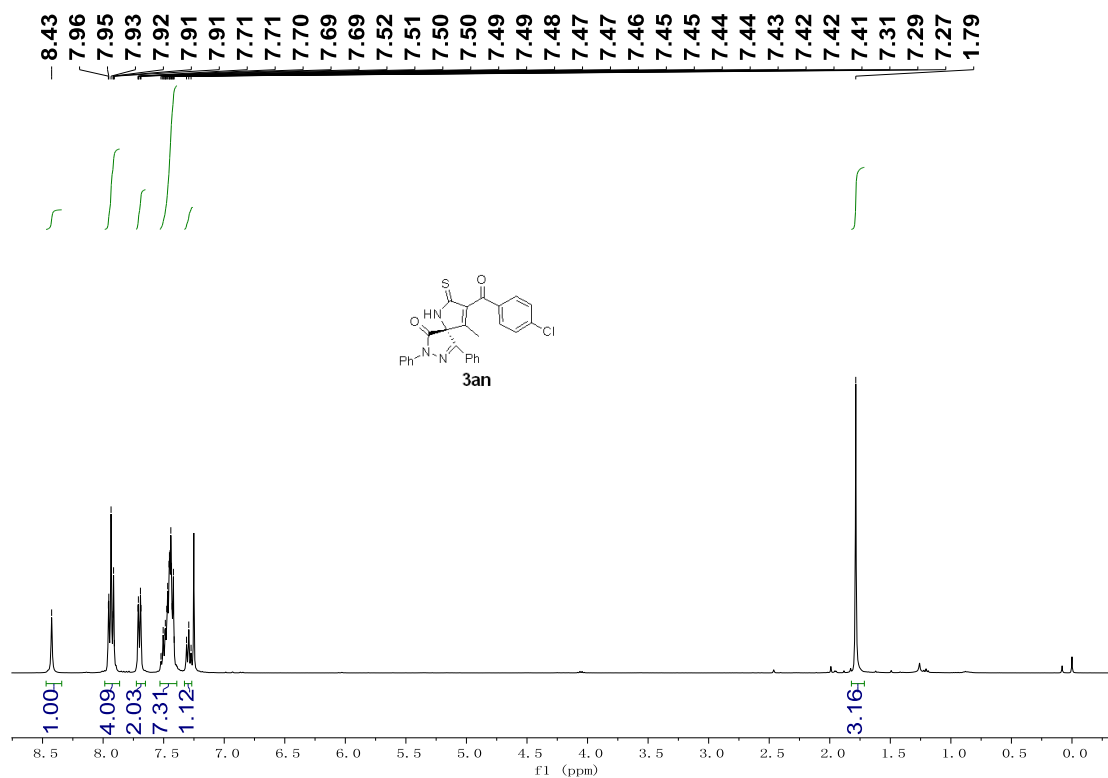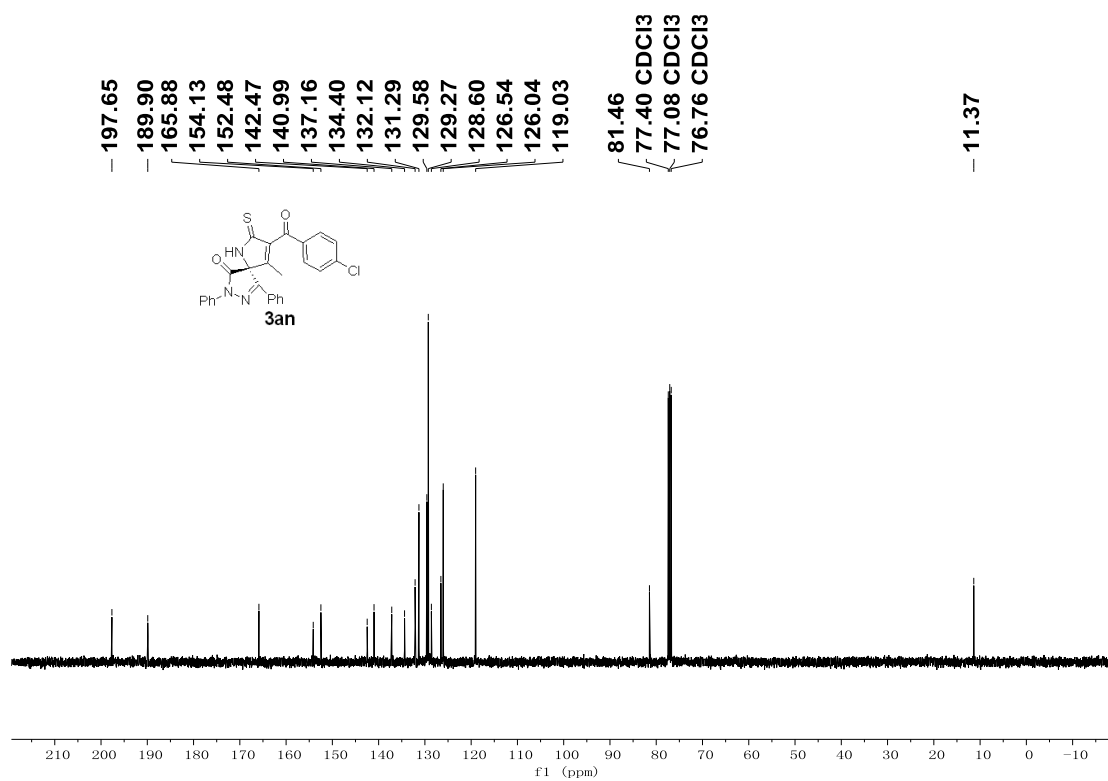

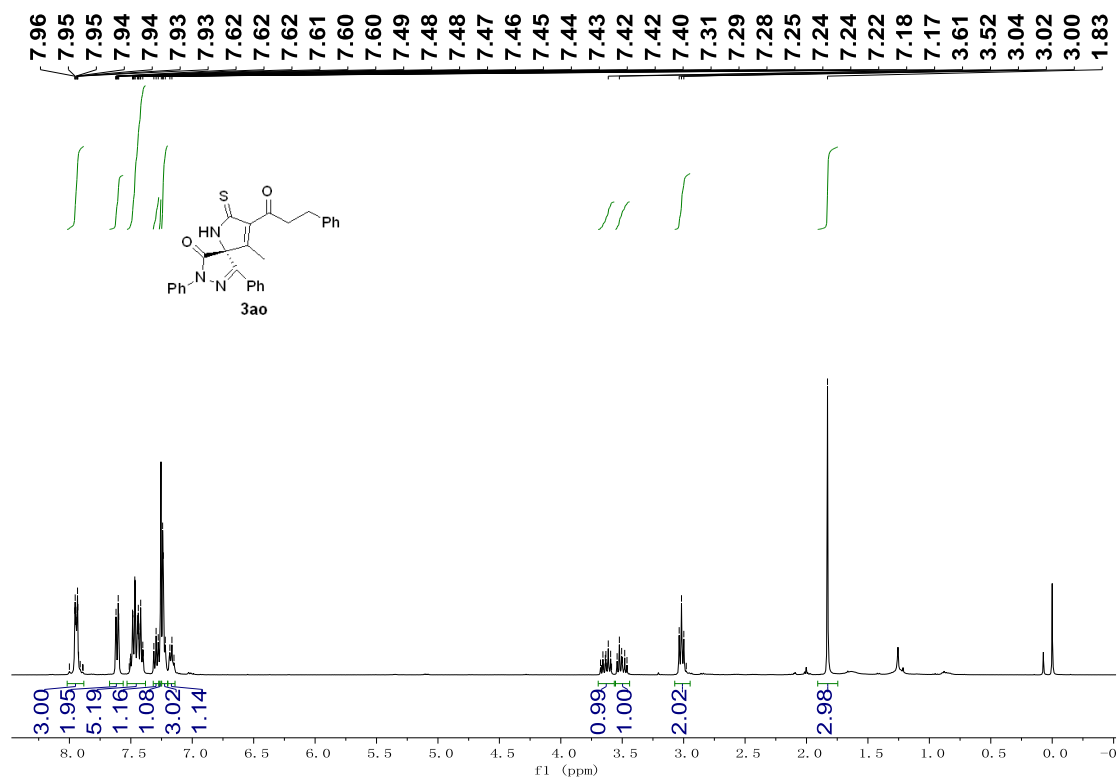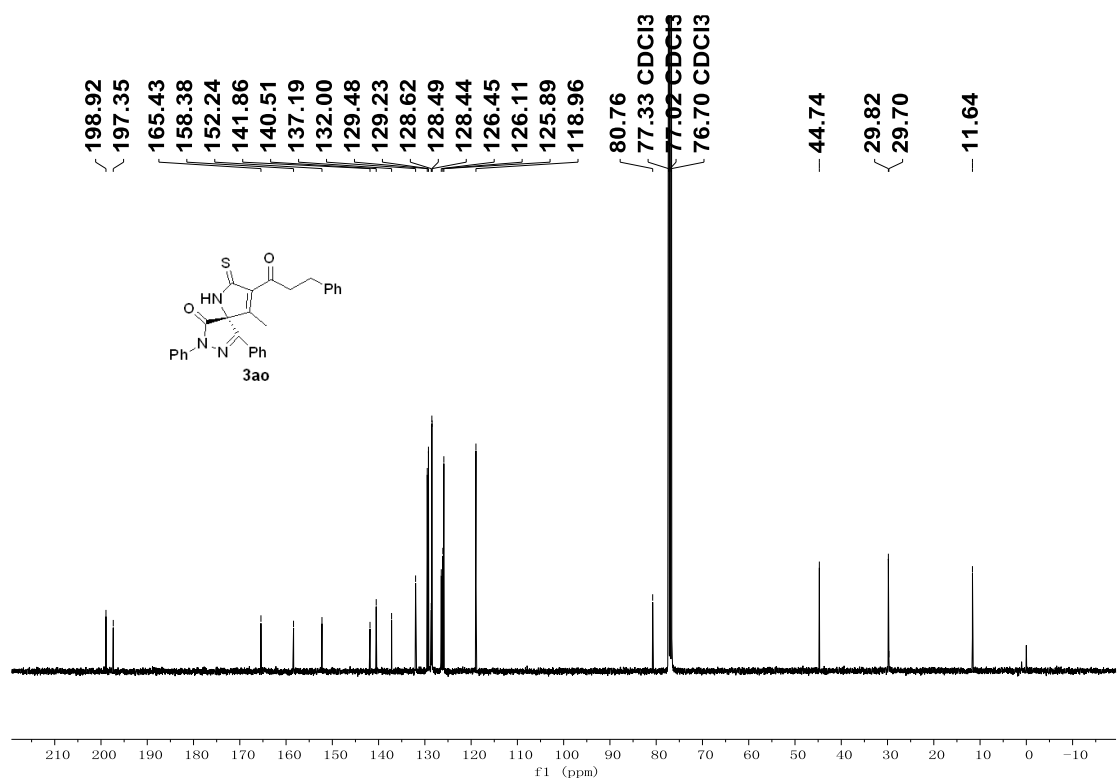



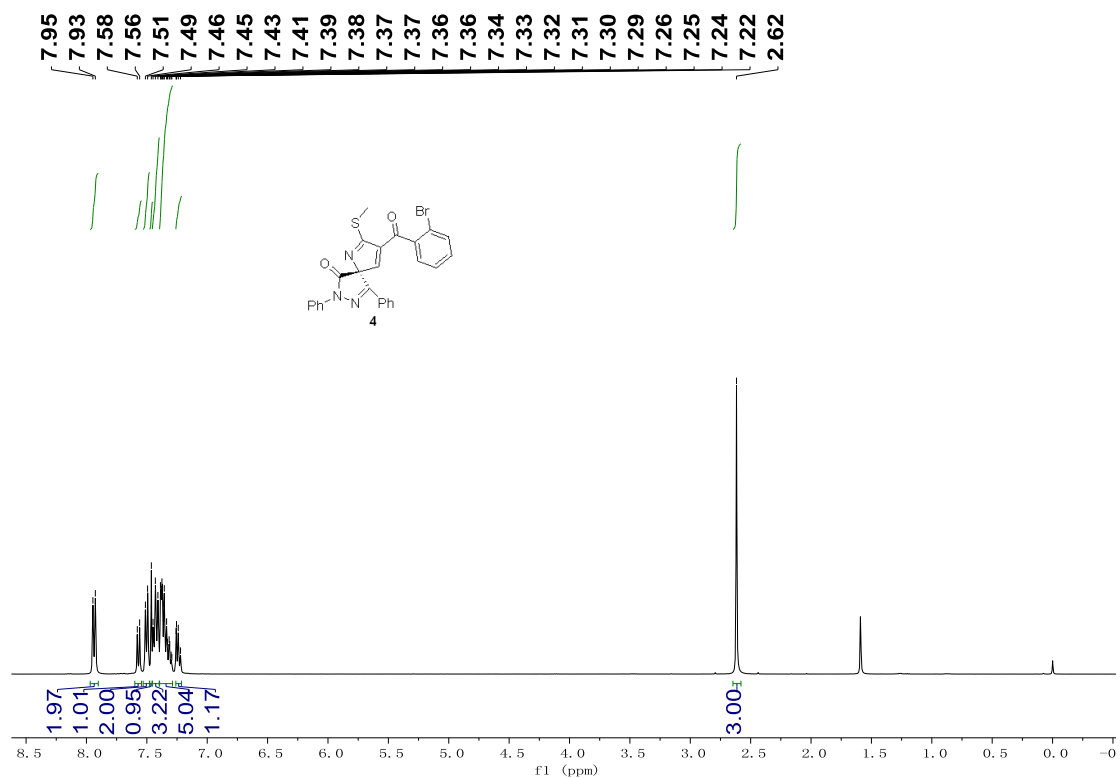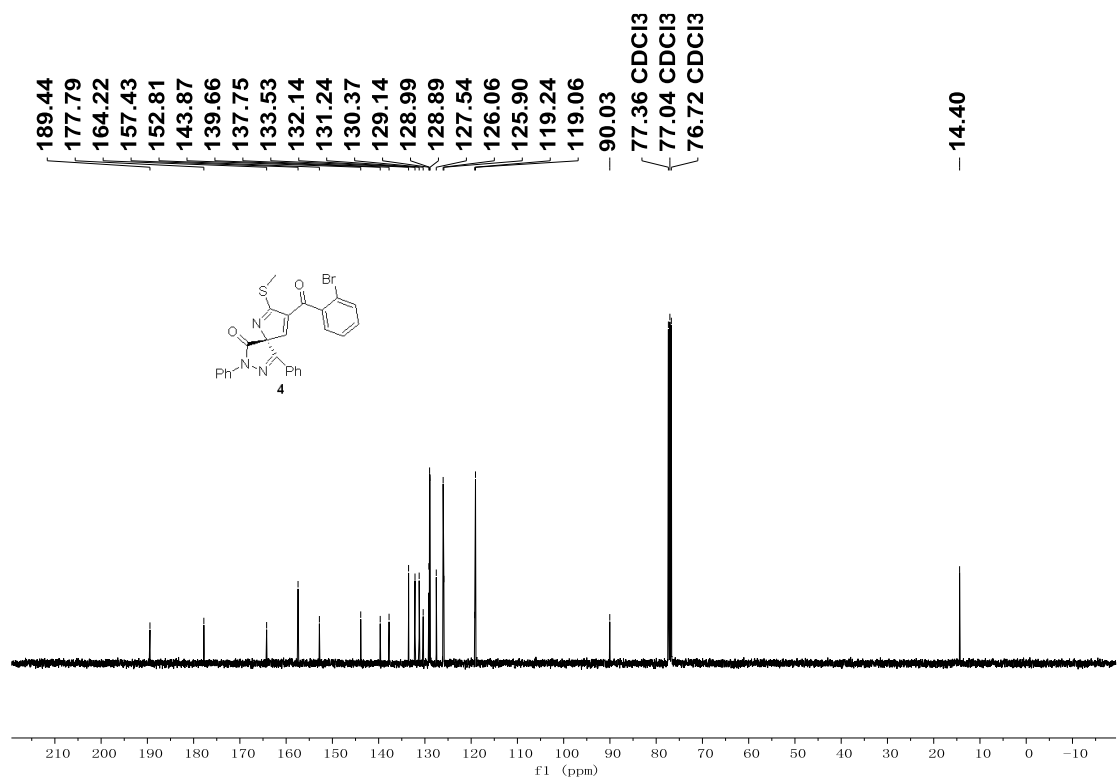

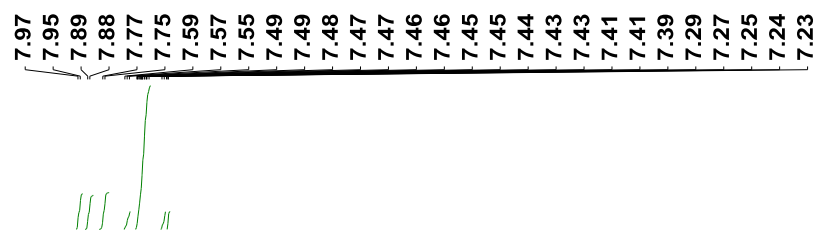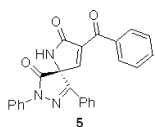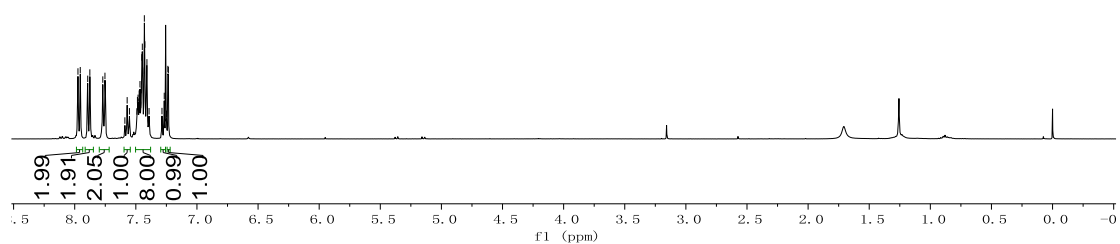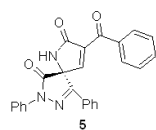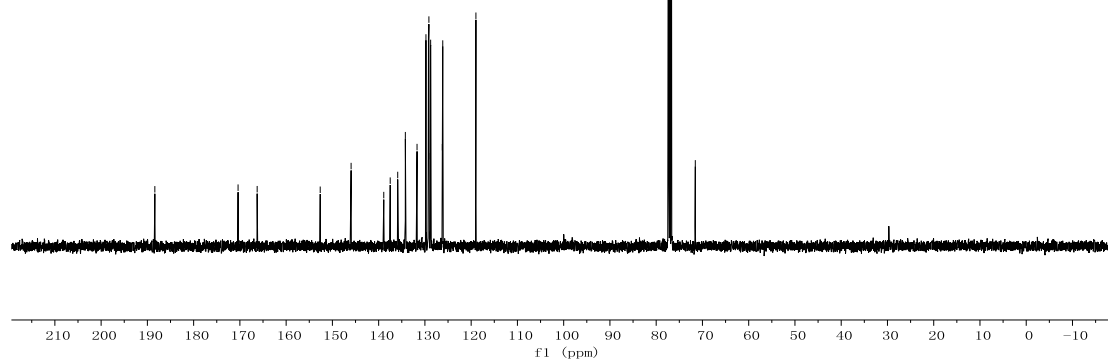

Supplement: d0ob02423f1.pdf [file d0ob02423f1.pdf]
